# Supplementary material
Source: PubMed Central journal article supplement (PMC4313228)
Supplement: JCM.02411-14_zjm999093810so1.pdf [file JCM.02411-14_zjm999093810so1.pdf]

## Supplemental file 1: Primer and probe sequences.

### Hybridisation Probes

| No | Name          | Sequence                           |
|----|---------------|------------------------------------|
| 1  | hp-101-abiGI  | AGAGGCTACCGCTTTAATACTCCTCCA        |
| 2  | hp-102-abiGI  | AGGTTACCGTTTCAGGAATACTCCATTGA      |
| 3  | hp-103-abiGII | TCCATTTGGATATTGCGACAGGTGATGT       |
| 4  | hp-104-abiGII | ACAAATGATCCATCTAGATATTGCAACTGGTGA  |
| 5  | hp-105-alp    | TGAATTGACTACTGTTGGTGCAGCTAGT       |
| 6  | hp-106-alp    | CCAGGTACAGCTACTATTACGTACAACATCC    |
| 7  | hp-107-alp    | CTGATTAAATTGGAACCGGGATACACTGC      |
| 8  | hp-108-alp    | GTGTTAGCAGCTGAAGTAGTTGAAGGAAG      |
| 9  | hp-109-alp    | AGTTGCTGCATCTACAATTCCAGGGA         |
| 10 | hp-110-alp    | CAGAGTACAGGAAGGGCTAGTCTTACCT       |
| 11 | hp-111-alp    | GTTTGCAGCTGAGGTGATTTTCAGGAAG       |
| 12 | hp-112-alp    | TGTGTTTGCAGCTGAAGTAATTTTCAGGAAG    |
| 13 | hp-113-alp    | TGACAGCTGTTGGTGTAGCTACTATCA        |
| 14 | hp-114-alp    | TCTTCCGCTTAAGGATAGCAACGAAC         |
| 15 | hp-115-alp    | ACAGGATTAGTGAAGATTCCAGAAGGATCA     |
| 16 | hp-116-bac    | AGCAACTAGAAGAGGAAGCTCATTCGA        |
| 17 | hp-117-bac    | CCTAAGCTTCCAGATGCACCGAAGT          |
| 18 | hp-118-bac    | ACGAACCACTTCAGTTTGTGTTGCGA         |
| 19 | hp-119-bps    | GCAACTTTAGCAGCAACATCACCAAC         |
| 20 | hp-120-cadC   | GGTGTTACGGTTGCAAATACCTCTCATC       |
| 21 | hp-121-cadD   | GGACAATTTCTAGGCTCTGTTAGTCTAATATTCC |
| 22 | hp-122-cadD   | AGTCCCTTCTGTTGGAGAACTTTGGA         |
| 23 | hp-123-clp    | GGTTAAGATTGTTGGTATTGCTGCTTCG       |
| 24 | hp-124-tetM   | ACGCCAGGACATATGGATTTCTTAGCA        |
| 25 | hp-125-ssp5   | ACTGGTAAAGAGACAAATGCTTGGGTTG       |
| 26 | hp-126-ssp5   | GTGACGGATGATGTTCTTGCCAAGG          |
| 27 | hp-127-ssp5   | CAAGGAGATATGCCAACCCAAGTGG          |
| 28 | hp-128-ssp5   | ACTATTGTGAATCCGATGACGGTTCGT        |

### Labeling primers

| No | Name          | Sequence                    |
|----|---------------|-----------------------------|
| 1  | lb-501-abiGI  | GGAGTAGGTACAGTAGTCATTCC     |
| 2  | lb-502-abiGI  | AGGAGTTTCTACACTAATAACTCCA   |
| 3  | lb-503-abiGII | AGCTTTATAGTCGTATGTTATCGG    |
| 4  | lb-504-abiGII | TTGCTTTATAGTCATAGGTAACGG    |
| 5  | lb-505-alp    | CTCCGAAACATTTGCATAAACT      |
| 6  | lb-506-alp    | CAAGACTTACAATATCTATTTGACCA  |
| 7  | lb-507-alp    | CAACACTAACTATATCAATTTGTCCA  |
| 8  | lb-508-alp    | GTCATGGCAGTATTTAATGTTGC     |
| 9  | lb-509-alp    | AGTGATGCTTGTATTTAAGGTCG     |
| 10 | lb-510-alp    | ACTAAAGCGGAATTTAATGTAGCA    |
| 11 | lb-511-alp    | AGTCATATTTGTGTTTAAACGTAACAG |
| 12 | lb-512-alp    | CTTCGTATGAGGACTTCCATCT      |
| 13 | lb-513-alp    | CGTTTACAATATCCACTTGACCA     |
| 14 | lb-514-alp    | CTGGTACGTCTGTATTCGGA        |
| 15 | lb-515-alp    | CTCCTACTTTGACCGTTTGG        |
| 16 | lb-516-bac    | CCTCCACAACCTTGTTTCAACT      |
| 17 | lb-517-bac    | CTGCTTGTCCAACCTTATTTAACC    |
| 18 | lb-518-bac    | GTAGAAGGTTTAGTCTGCTTCG      |
| 19 | lb-519-bps    | CGTCCTCTTGTCTACTGATGG       |
| 20 | lb-520-cadC   | ACTTAACAATCCCTTGCTTATGG     |
| 21 | lb-521-cadD   | TGGAATCAAACCGAGTAAACCT      |
| 22 | lb-522-cadD   | CCAATCCTAAATAGACAACGG       |
| 23 | lb-523-clp    | GGACTAATCTCAACAACATCACC     |
| 24 | lb-524-tetM   | TGCAGAAATCAGTAGAATTGCC      |
| 25 | lb-525-ssp5   | CACATCAGCATCTGCATACC        |
| 26 | lb-526-ssp5   | CTGGGTAATCGTCTACCATGT       |
| 27 | lb-527-ssp5   | GGATTGTAGGGAGTCACTGT        |
| 28 | lb-528-ssp5   | CCACATTATCATAAGACTTCCCT     |

## Hybridisation Probes

|    |               |                                      |
|----|---------------|--------------------------------------|
| 29 | hp-129-srr    | TCAACCGAGAGCGATGAGAGTTGTATC          |
| 30 | hp-130-srr    | CCGAATCTCAACACGAAGTTAAGCATCA         |
| 31 | hp-131-srr    | CCACAAGTTCTTCAAGCTCAGTGACTTC         |
| 32 | hp-132-srr    | AAGATGTATCAAGCGAGTTGCAGAAAGT         |
| 33 | hp-133-srr    | GGTAAAGACGTATCAAGTGAGTTTCAGAAAGT     |
| 34 | hp-134-speM   | TGGTATCAAGATAAAGACCATGTGAAGGGT       |
| 35 | hp-135-sip    | GCTGATTTGGTAAAGCAAGACAATAAATCATCA    |
| 36 | hp-136-sip    | AGTATTTATGGACCTGCTAATACTTGGAAATGC    |
| 37 | hp-137-scpB   | ACTAGTATGTCTGCGCCATTAGTAGCG          |
| 38 | hp-138-scpB   | ACTAGTATGTCTGCACCATTGGTAGCG          |
| 39 | hp-139-scpB   | AGCGTATTGCTTATACTTACATGGATGAGGA      |
| 40 | hp-140-scpB   | AGCGTATTGCTTACACTTATATGGATGAGGA      |
| 41 | hp-141-rogB   | TCATGTCATCAACTTGGTTTATCTGAACTACT     |
| 42 | hp-142-rogB   | CGACTCCACTTATCACCAGTTGAGC            |
| 43 | hp-143-rogB   | TCCTTTGTGCTCACCTAGAAAGAATTATCAA      |
| 44 | hp-144-rogB   | CTTCTCCTTTGTACTCATCTAGAAAGAATCATCAA  |
| 45 | hp-145-rogB   | TCTTATTCTGTGCTCATCTGGAAAGGGTG        |
| 46 | hp-146-rogB   | TGCTCTGTGCTCACCTTGAAAGAGT            |
| 47 | hp-147-Q3K0L2 | CGACAATGTATGAAATCGTTTGGCGTTTG        |
| 48 | hp-148-Q3K0L6 | TGGAGTTGTTATAACGAGAATATTAGGGAACAAA   |
| 49 | hp-149-rhaD   | ACCACCGTGTTGTTATTCATAATCACGC         |
| 50 | hp-150-rgfD   | GGTTTATCTATTAGAACAATTAATACGAGGAGACGA |
| 51 | hp-151-rgfC   | CCAATTTACGAATGGGTGCATGGTGA           |
| 52 | hp-152-rgfC   | TCTCCAATTTACGAATGGTTGTATGGTCAGT      |
| 53 | hp-153-rgfC   | TGAAAGTTATTGACCGTTATCCCAATGCA        |
| 54 | hp-154-rgfC   | TGTCAGGGGAGTTATCAATCGTTATCCA         |
| 55 | hp-155-rgfB   | TCCTACTGGAAATCAGGGTTATGAACTTGT       |
| 56 | hp-156-rgfA   | AGCAGAAGGATTGAAGAAGTTTTACTATATGCT    |
| 57 | hp-157-rgfA   | GCCAAAGGATTGAGGAAGTATTGTTGTACG       |
| 58 | hp-158-rgfA   | AGAATGGAATTCACAGCCACTTTGGG           |
| 59 | hp-159-Q8DZ44 | ACAAGGGGATGTGATAGACTTTGTACAGT        |
| 60 | hp-160-Q8DZ44 | CAGGGAGATGTGATTGACTTTGTTTCAGT        |

## Labeling primers

|    |               |                             |
|----|---------------|-----------------------------|
| 29 | lb-529-srr    | ACAGTTGTTACATCTCCTTCAC      |
| 30 | lb-530-srr    | TAGAAGGTAAGGCAGAATACACC     |
| 31 | lb-531-srr    | CCGAGTTATCACCTGTTTCTG       |
| 32 | lb-532-srr    | AGGCTCACTAAGAGTGTTATCT      |
| 33 | lb-533-speM   | CGTTGATAAGTCAACTTCTTCTTC    |
| 34 | lb-534-sip    | GCTTAGTGTATCACCATATTTCA     |
| 35 | lb-535-sip    | GTAACGCCACCACGATCT          |
| 36 | lb-536-scpB   | TGGTGTTCATATCAGGATACTGT     |
| 37 | lb-537-scpB   | GGAAGAGTAAAGGTACCATCTTCA    |
| 38 | lb-538-rogB   | TCGATATTCAGAGAGAGTTGACT     |
| 39 | lb-539-rogB   | GGATATGGATAGAAAGTTTATGACCA  |
| 40 | lb-540-rogB   | TAAAGTCTGTAGTTAGTACGGCT     |
| 41 | lb-541-rogB   | CAACACAACCTCTTATAGGAGGC     |
| 42 | lb-542-rogB   | GCAACACAATATTTATAGGAGGC     |
| 43 | lb-543-Q3K0L2 | TTCAAACATTTCTCCAACACTACATGT |
| 44 | lb-544-Q3K0L6 | GTACTGCATGAACTTGTGAGA       |
| 45 | lb-545-rhaD   | TCTATCGTTAAACGTCGACTAGT     |
| 46 | lb-546-rgfD   | TCTCTAAACGTGCCTGTTGA        |
| 47 | lb-547-rgfC   | CGGTAAATAACAGTATTGATGGCT    |
| 48 | lb-548-rgfC   | TCGAAAGTTTGGCAGAAACT        |
| 49 | lb-549-rgfC   | CTAAGCCCTGACGGAAAGT         |
| 50 | lb-550-rgfB   | GCTATCCTTTAATGCTAATGGACT    |
| 51 | lb-551-rgfA   | GGTACTTGTACTTGACTATAGCG     |
| 52 | lb-552-rgfA   | GTAATTGTACCTGGCTGTAACG      |
| 53 | lb-553-rgfA   | GATGACATTGAAAGAGCCTAGG      |
| 54 | lb-554-Q8DZ44 | CCAGTTTCAAGGTAAGACAAGG      |
| 55 | lb-555-Q8DZ44 | CCCGTTTCAAGATAGGATAGAG      |
| 56 | lb-556-Q8DZ34 | GCTCATCATCAAAGGAGTATCA      |
| 57 | lb-557-Q8DZ34 | GATACTCATGACAAAGCTCATCA     |
| 58 | lb-558-pilC2b | TGAACAGCTTTTGTAGTAGATTGA    |
| 59 | lb-559-pilC2b | TGCTACTGTAGGAGTAATCGTC      |
| 60 | lb-560-pilC2a | TCAGTAGGAGAAGTCAAGATACTC    |

## Hybridisation Probes

|    |               |                                   |
|----|---------------|-----------------------------------|
| 61 | hp-161-Q8DZ34 | GGGAAATCCTTTGACTTGGATTGTCTCA      |
| 62 | hp-162-Q8DZ34 | GCAAATCCCATCACCTGGATTGTGT         |
| 63 | hp-163-pilC2b | ACACAAGTAAACCTTGATAGTAACCAAGCC    |
| 64 | hp-164-pilC2b | CCTAAGGATGGGAAGTACGATATTACAGCA    |
| 65 | hp-165-pilC2a | AGCCAAATGACAGATAGCGAATTGAACC      |
| 66 | hp-166-pilC2a | GGACGATTTACGACCGATCAAGATGG        |
| 67 | hp-167-pilC1  | GCTTAAAGTTGGTGTGGATGGTGATACC      |
| 68 | hp-168-pilC1  | CAGATTCATCAGGGCATATCAGAATTTCCG    |
| 69 | hp-169-pilB2b | AGCCAGGTAACCTTCATCAACATCTAGTTCTC  |
| 70 | hp-170-pilB2b | AGCCAATGTTGGAAATAACCAAGTTGGA      |
| 71 | hp-171-pilB2b | CGTTACCTAACTTCAACTGGAGTATCAGGA    |
| 72 | hp-172-pilB2a | CTGGTTACGCTAAATTAGCAGGTGATGT      |
| 73 | hp-173-pilB2a | CCAAGTGGTTATGCTAAATTATCAGGTGATGT  |
| 74 | hp-174-pilB2a | CCAACAGGTTATGCTAAATTGTCAAGTGATGT  |
| 75 | hp-175-pilB2a | AGGTTATGCGACATTGTCAGGTGATGT       |
| 76 | hp-176-pilB2a | GCTCCAGCAGGATTTGCTAAGTTGG         |
| 77 | hp-177-pilB2a | CAGGTTATGCTAAATTGTCAGGCGACA       |
| 78 | hp-178-pilB2a | ACTTTGGCGAGGGATCTAAAGAAATCGA      |
| 79 | hp-179-pilB2a | AGGTTCTAAAGAAATTGACGGTGCTTTCT     |
| 80 | hp-180-pilB2a | GGATATTTTGGGCAAGGTTCTAAAGAAATCG   |
| 81 | hp-181-pilB2a | CCTTAAATCTTATTTTGGCTCAACCGATGCT   |
| 82 | hp-182-pilB2a | GCGAAAGAAATCGCAGGTGCTTACT         |
| 83 | hp-183-pilB2a | TGGATAGCTACTTTGGCAATGACTCAAAGA    |
| 84 | hp-184-pilB1  | TCGGAAATTACTTCTAATGGTGGTATCGAGA   |
| 85 | hp-185-pilB1  | AGACGGTACGTTTGAGATTAAGGTTTGG      |
| 86 | hp-186-pilA2b | ACAAGGTAAGGAGACAATGTATCAGTCATCC   |
| 87 | hp-187-pilA2b | TCCTCAAGGTAAAGAAGCTGAGTATAAAGCT   |
| 88 | hp-188-pilA2b | GAGTTGCCTTCAACAGGTGGTATTGG        |
| 89 | hp-189-pilA2a | GATTTCTGAATATCATGAGGAAGGTGACAAGC  |
| 90 | hp-190-pilA2a | ACCTACTTCACACTCAGAAAGCAAAGTAGA    |
| 91 | hp-191-pilA2a | GCAAACAGTGATAATAGGGTTGCATTAGTTACC |
| 92 | hp-192-pilA2a | TGTTGAAAACCGAGCAGCTTTAGTTACT      |

## Labeling primers

|    |               |                           |
|----|---------------|---------------------------|
| 61 | lb-561-pilC2a | CCTCAATTTCTCCCTTATCATCA   |
| 62 | lb-562-pilC1  | TCATAAAGTTCAAAGACAACGC    |
| 63 | lb-563-pilC1  | TGATATCCTGACTGTGTCTCG     |
| 64 | lb-564-pilB2b | TCTGTTACACTAGAAGCAGGAG    |
| 65 | lb-565-pilB2b | TCATTAGGTAAAATGAACTCACCC  |
| 66 | lb-566-pilB2b | CACTGGGAAGTATAAACTCACC    |
| 67 | lb-567-pilB2a | ACCTGTTATGTATGACCCTTGA    |
| 68 | lb-568-pilB2a | CCTTTGCTATATGATGTGGCAG    |
| 69 | lb-569-pilB2a | AGAACCTTTACTGTATGAAGTAGC  |
| 70 | lb-570-pilB2a | CCCTTCGCTATACGATGTATCA    |
| 71 | lb-571-pilB2a | TCTGCTTTTGAGCTGTTTCC      |
| 72 | lb-572-pilB2a | ACTTGTGTAAGAATCGTGTCC     |
| 73 | lb-573-pilB2a | TCAAAGCTAAAGCAAAGAACG     |
| 74 | lb-574-pilB2a | CCTTAACATATTGTACGACACCA   |
| 75 | lb-575-pilB2a | TGTCTGACTTTCATTCATAACCG   |
| 76 | lb-576-pilB2a | CAAAGTATCGACTTCCTTACC     |
| 77 | lb-577-pilB2a | GTGATGTATTTAGTACCAGCTTCA  |
| 78 | lb-578-pilB2a | TCATTAGCTTTGATATATTCACCCT |
| 79 | lb-579-pilB1  | ACATTGTCACCAAGTTTAGCA     |
| 80 | lb-580-pilB1  | TGTAAGTTACTGCTGTACCCT     |
| 81 | lb-581-pilA2b | GTTCTCCCTCCATTAGTAGTTGT   |
| 82 | lb-582-pilA2b | CCTCCTGTAGTTGAGGTCG       |
| 83 | lb-583-pilA2b | CACGATACCTGCTCCTATTACT    |
| 84 | lb-584-pilA2a | CACCTGTTACCTCAGTAGTTACT   |
| 85 | lb-585-pilA2a | GGTGGAATATGCGTGTGG        |
| 86 | lb-586-pilA2a | GACATCTACACTCCTACCATCA    |
| 87 | lb-587-pilA2a | AACTTTAACTGTCCTTCCATCAA   |
| 88 | lb-588-pilA1  | ACTGTAATTATGTGTAGTTGCTGT  |
| 89 | lb-589-pilA1  | CCCTCATTACTCATTACAGAGAGT  |
| 90 | lb-590-pepS8  | CAATAACTGCAACAACAGTTCC    |
| 91 | lb-591-pepS8  | TGATATTGTTATACGTGCTTCTGG  |
| 92 | lb-592-nss2   | TGATATGGCTCTTTAACCACAG    |

## Hybridisation Probes

|     |              |                                    |
|-----|--------------|------------------------------------|
| 93  | hp-193-pilA1 | GGTAAAGCGCTGAATGATAGTGTATCATGG     |
| 94  | hp-194-pilA1 | AGTTCCTGTTACTGGAGGAACGACAC         |
| 95  | hp-195-pepS8 | TGGTTTGCCAGAAGTTTGGAACTC           |
| 96  | hp-196-pepS8 | GCAGTCAATTATTAGTTGAATCAGAAGCAGCT   |
| 97  | hp-197-nss2  | CGAGTTACATGTTTATACTGACCATAACATGCA  |
| 98  | hp-198-nss2  | GAGGAATATATGGAAATTGTTAGCGATGTCAGG  |
| 99  | hp-199-pavA  | AGCTAAGCAACAAGACGAACTTCTAGCT       |
| 100 | hp-200-pavA  | GAGTTGTGGTTTCATGCCAAGGATATCC       |
| 101 | hp-201-nss1  | CGTCAACTTGGTTATGATGAAATGGGAATCT    |
| 102 | hp-202-nss1  | AGAAGATAGCAACTCTCTTGCGAAATGGT      |
| 103 | hp-203-merR  | TCATATGATGACGTTAAGCGTGTGGG         |
| 104 | hp-204-merA  | GTCTAGTTATCGTCGTGGTGAAGCAGT        |
| 105 | hp-205-merA  | GGCAGTAGAGAAGTCATTGAATCAGATCAGT    |
| 106 | hp-206-hylB  | CCTGTATCTGGAAGCTGGTCACATACA        |
| 107 | hp-207-hylB  | AGTCAATGGACAAATCTTTACGGAGCCA       |
| 108 | hp-208-hylB  | AGCTATTCGTACTGTAAAAGAGAGTCTGGC     |
| 109 | hp-209-gtfB  | GTAGTGGTGCTGATATTGTTGACTTAGGTGT    |
| 110 | hp-210-gtfB  | TTGGGAGATAAAGGGAAATAATATAGAGGCTGA  |
| 111 | hp-211-gtfB  | ACATAGGTGCTTTGACCGAGATGTCTAG       |
| 112 | hp-212-gtfB  | TCATATTGCAGCGTACACAGAAATGTCTT      |
| 113 | hp-213-gtfA  | GGATAAAGTGCATCGTGTAGAAATCGTTTCAA   |
| 114 | hp-214-gtfA  | ACATCGTCCAAAGGGTAGAGTATCTTATGG     |
| 115 | hp-215-gtfA  | GTGAGGGGTTTGGCTTAACTTTACTTGAAG     |
| 116 | hp-216-gtfA  | GGTTTAAACCTTGATGGAGGCAATCGG        |
| 117 | hp-217-gbsi1 | CACTATCGAGCAGATGGATGACTATCTTCAC    |
| 118 | hp-218-gbsi1 | TGTCCCTGGTTCATAATATCATTCAAGATGG    |
| 119 | hp-219-femH  | ACCTTATGATACCTACCAAGAGTTTACTGGTG   |
| 120 | hp-220-femH  | TCGTCAACGTACTGAGCTTGTCAATCA        |
| 121 | hp-221-femH  | TGATGATTACCAATTATTCAGTTTCGGGAGT    |
| 122 | hp-222-femH  | TCATAGGCAACGCTCTGAAATAATTAATCAACTG |
| 123 | hp-223-fbsB  | CGATAGTCAAGTATAATGCGGGTAATGTAGA    |
| 124 | hp-224-fbsB  | TGGTGCAGTCAATGTATTGAGAGAAGATACA    |

## Labeling primers

|     |              |                             |
|-----|--------------|-----------------------------|
| 93  | lb-593-nss2  | ACTGCATCGGTTAATAGTTTTTCG    |
| 94  | lb-594-pavA  | AGATAGGTAGTTAGAAGCTCTCCT    |
| 95  | lb-595-pavA  | GTCACCTGGATTGAGGTTATCC      |
| 96  | lb-596-nss1  | CCTAGTACTTCTTTCACCATGC      |
| 97  | lb-597-nss1  | CATATGCACAGCATCTATCAACA     |
| 98  | lb-598-merR  | TAAATCTCGCTTAAAGAGAAACCA    |
| 99  | lb-599-merA  | CACTTTCAACCTCAATATCATCG     |
| 100 | lb-600-merA  | CGTATTTGGTTTTCTTCCAGTG      |
| 101 | lb-601-hylB  | TCTTTATCAATCCAAGCAGACC      |
| 102 | lb-602-hylB  | TGGTCGATATAAGTATTCCAATCC    |
| 103 | lb-603-hylB  | TTGGCAGAGCCTTCTATATCT       |
| 104 | lb-604-gtfB  | CGCTTATGATTTGGGTTTGC        |
| 105 | lb-605-gtfB  | ACGTTTATACTTCGGCTCTTGA      |
| 106 | lb-606-gtfB  | GTGATATTTGGGTAGAGTACAACA    |
| 107 | lb-607-gtfB  | TGAAATATTCGGATATAGCGTTACA   |
| 108 | lb-608-gtfA  | ACTCTGAGAAAGTACGTGTATAACT   |
| 109 | lb-609-gtfA  | TCTTCGGGAGCATAATATTCTGA     |
| 110 | lb-610-gtfA  | GAACATCAAACCCAATCAAAGGA     |
| 111 | lb-611-gtfA  | GGAACATCTAAACCAATTATCGGA    |
| 112 | lb-612-gbsi1 | GAACCGGTTGAGGTTTATAGC       |
| 113 | lb-613-gbsi1 | GTACTTACGAATCAGTGACTCC      |
| 114 | lb-614-femH  | CATCAATAAGATAGGTGTTCCGGT    |
| 115 | lb-615-femH  | TCTTTGCGACGTTTATCTAAACT     |
| 116 | lb-616-femH  | TCTTCAATCAGATTATCATTTCCCT   |
| 117 | lb-617-femH  | GACTGAACTTCTTGTCGTCG        |
| 118 | lb-618-fbsB  | GCGTTCAAGTTCATCTACTATAACA   |
| 119 | lb-619-fbsB  | AGCACGATTCCAAATCATATTCTC    |
| 120 | lb-620-fbsB  | GCAGTATCCAATAAATAACGAAAATCA |
| 121 | lb-621-fbsB  | CTCCTTGAATGCCTACAGAAG       |
| 122 | lb-622-fbsB  | CCAGGAGCATCTTTTGAAACA       |
| 123 | lb-623-fbsB  | TCTCTATCTCTGATATGTGAAACCC   |
| 124 | lb-624-fbsB  | CCATTTACTTCAGTATCAGTAGTCG   |

## Hybridisation Probes

|     |              |                                      |
|-----|--------------|--------------------------------------|
| 125 | hp-225-fbsB  | TTCGGTCATAAAAATAGCGTATGGATGGAAA      |
| 126 | hp-226-fbsB  | AGTTACAGAAGCTGTTGGAACGAATGAAATCG     |
| 127 | hp-227-fbsB  | GGGAGCATAAAGATGAAGCAGAAATACTGG       |
| 128 | hp-228-fbsB  | TCCAGGACCCTATATTAGAAGGGTTAGTGAG      |
| 129 | hp-229-fbsB  | GAGGAGTCATCTCAGAAAGCAAGGATAAC        |
| 130 | hp-230-fbsB  | TCTAAGATTCAGCATTCGAAGACGGATTTGA      |
| 131 | hp-231-ermC  | GGCAGAAGTTGATATTTCTATATTAAGTATGGTTCC |
| 132 | hp-232-ermC  | AGCACAGCTACAGAAAGTTATTTAATAGTGGA     |
| 133 | hp-233-ermC  | TGTCTTTGAAAGTGAAGCAACAGTTAGTTACT     |
| 134 | hp-234-ermB  | TCGTGTCACTTTAATTCACCAAGATATTCTACA    |
| 135 | hp-235-ermB  | TTCACCGAACACTAGGGTTGCTCTT            |
| 136 | hp-236-ermA  | TGAAAGCAATTCGAAATATAGTTACCTTATTGTGG  |
| 137 | hp-237-ermA  | CGTTGAGAAGGGATTTGCGAAAAGATTG         |
| 138 | hp-238-ermA  | TGTAGAGAGGGGATTTGCTAAAAGTTG          |
| 139 | hp-239-ermA  | CGACATCAACCATTGATTTCAAAGAAGGACT      |
| 140 | hp-240-ermA  | TGAAAGGCATAAACCATTTATTTAAAGAAGGACT   |
| 141 | hp-241-emrB  | AGTAGGACGTATTATTCAAGCGATTTCTGTAGG    |
| 142 | hp-242-emrB  | TGGAGCTGTATATGATAAAGTTGGTGCAAGA      |
| 143 | hp-243-cpsQ  | ACGATTACCCTCAGAATGTTACTATTCGCTATAC   |
| 144 | hp-244-cpsQ  | TCACCAATATAAGTCTGTAGTAAGAAGGAGTGAG   |
| 145 | hp-245-cpsR8 | TGGAGTATTCCTGTACGTCGCTATTGG          |
| 146 | hp-246-cpsP  | ACCTCCTCTTCGTAAGGGAAGTCAGT           |
| 147 | hp-247-cpsN  | AGATATGTAGGCCTTGTTTATCCTCGATATTCA    |
| 148 | hp-248-cpsN  | GGTAATACCTACACTAAAGAGTGAAGAGGCT      |
| 149 | hp-249-cpsM  | AGTTATACATTATTGTTGGTTTGGAGGAAATCCCT  |
| 150 | hp-250-cpsM  | AGCTAGGGAGTTAAGTTATGATGTGAATACAG     |
| 151 | hp-251-cpsM  | GGTAAGGTTGATTGTCTGACTAGTGTTACC       |
| 152 | hp-252-cpsM  | GCAAGGGAGATTAGTTGTGATGTGAATACAG      |
| 153 | hp-253-cpsM  | CTTGTGAGCTACCTGGAGAGGTTAATACAG       |
| 154 | hp-254-cpsM  | TGCTTTTCGTGTCTGATTATGCTAGATTGGA      |
| 155 | hp-255-cpsG  | TGCTATTGATCAAGAAGTGTTCATTCAAACG      |
| 156 | hp-256-cpsG  | GGAGAAAGCAGTTTGGTGAACATATCAATGA      |

## Labeling primers

|     |              |                             |
|-----|--------------|-----------------------------|
| 125 | lb-625-fbsB  | GCAATTTCTCTTAAATCATTGAAGC   |
| 126 | lb-626-ermC  | GTGAACGATTTGTATTTAGCAACC    |
| 127 | lb-627-ermC  | GCTATTCACTTTAGGTTTAGGATGA   |
| 128 | lb-628-ermC  | AGAACGATTTGTATTGAGTAGCC     |
| 129 | lb-629-ermB  | CCTCTGTTTGTAGGGAATTGA       |
| 130 | lb-630-ermB  | ACTGTTTACTTTTGGTTTAGGATGA   |
| 131 | lb-631-ermA  | TCTCCACCATTAATAGTAAACCCA    |
| 132 | lb-632-ermA  | CGATATTCACGGTTTACCCA        |
| 133 | lb-633-ermA  | TTCCACCATTAACAGCAAACC       |
| 134 | lb-634-ermA  | CCACCATCAATAGCAAACCT        |
| 135 | lb-635-ermA  | ACATGATATTCCTGTTTACCCA      |
| 136 | lb-636-emrB  | CATAACAACCTGCATCAAAGG       |
| 137 | lb-637-emrB  | CGTCGCTACACCTAGTATGG        |
| 138 | lb-638-cpsQ  | GACTTCATTTCGGAACTCTTCA      |
| 139 | lb-639-cpsQ  | ACCTAGCATCTAAATCAACTTTCA    |
| 140 | lb-640-cpsR8 | AGCATACTTAACCATTAGTCTTTCT   |
| 141 | lb-641-cpsP  | CCAATAATCCAGTCAGTAAACTCTC   |
| 142 | lb-642-cpsN  | GGATTCAACCAATTATTACCTTGG    |
| 143 | lb-643-cpsN  | ACCTTGCTACCTTCCAAAGA        |
| 144 | lb-644-cpsM  | TCATAATCCGGACATTGTTCTC      |
| 145 | lb-645-cpsM  | CGTAATCTGGACATTGTTCTCTC     |
| 146 | lb-646-cpsM  | TCTTCGTATACCGACATATTGTCT    |
| 147 | lb-647-cpsM  | CCAACCTCCTTCGTAATGATGT      |
| 148 | lb-648-cpsM  | AGTGATGTCCTTTAACAGCG        |
| 149 | lb-649-cpsM  | AGTAAATCTGTGGTAATTGCCA      |
| 150 | lb-650-cpsM  | CATCTGTATCTAAATATATCCCACCA  |
| 151 | lb-651-cpsG  | TGACCACTGACAATTCTGAGG       |
| 152 | lb-652-cpsG  | TGTAACCTTTCAATATCTACAACGA   |
| 153 | lb-653-cpsG  | CCAAGCCAAGGGATACAGG         |
| 154 | lb-654-cpsG  | TCAACTTGACCTTATTAACAAAATCT  |
| 155 | lb-655-cpsG  | TTCATATTTCAAGAATAACTCTTTCAA |
| 156 | lb-656-cpsH  | AGTAAAGAAACGGTAGATAAATAGCA  |

## Hybridisation Probes

157 hp-257-cpsG CCATAGTAGTTCCCAGACAAGAACAGTTTG  
158 hp-258-cpsG AGAACAGTTTGGAGAGCATGTGAATAATCA  
159 hp-259-cpsH TGGATTTAATCATCCCAATACCTTACATGCCT  
160 hp-260-cpsH GCACCGTATGTACAGTTTATTGCGATGT  
161 hp-261-cpsH AGGGATGGACAATTTATTCTGAGAAGTGACT  
162 hp-262-cpsH TGAAGAATTTGATCCTAATCATTGGAGTGTTG  
163 hp-263-cpsH TTGAGGAAATAGATCCTAATCATTGGAGTATTGT  
164 hp-264-cpsH TGGAAGAGTGAGTTTAGAATATCTATAAGCAATTCT  
165 hp-265-cpsH AGAGATGGACATTTCAATTCTGAGAAGTGACT  
166 hp-266-cpsH AGTGATGTTAGTTGCAATTTTACTGTGTGGAA  
167 hp-267-cpsH AGTAATGTTAGTTGCAATCTTATTGTGTGCAA  
168 hp-268-cpsH GATGTTTGTGCAATCTTCTTGTGTGGAA  
169 hp-269-cpsH TCTATCAAGTTCCCATGTTTACTGTTGCAG  
170 hp-270-cpsH ACTAGTGATTATCCCATATTGATGTGCGCA  
171 hp-271-cpsH GGTAGAGATTTGATTGGGTCAGACTGGA  
172 hp-272-cpsH GAGTCATTGCTGCATTCAATTCCTGG  
173 hp-273-cpsH TCATTTACAACCTTGTAGACGGCTTAACTCTTTT  
174 hp-274-cpsH CATTTACAGCTTGTAGACGGCTTAACTCTTTT  
175 hp-275-cylD GTGTAATTGCTATGGATCAAGTCAACCGT  
176 hp-276-cylF TCACAAAGGAAGAATTTAGAGGTCGCGA  
177 hp-277-cpsI GTC AAGAGCACCGTATAGTCGTAGATACG  
178 hp-278-cpsI AGAAGATGTGATAGTTGGTGAAGATATGCT  
179 hp-279-cpsI AGATATTTGCAAGAGGTTAGACACTACAGCA  
180 hp-280-cpsI ACATCGAAGAAACATTAGAAAAGTGTCATGG  
181 hp-281-cpsI GCTAGAAATTTAGGAGTCAAACCTAGCTGAAGG  
182 hp-282-cpsI ACTTTATACTTTAGAGGTGGCGTTGGAAGA  
183 hp-283-cpsI TGGGAGATGTCTAGATAGTATTCTTGAGCA  
184 hp-284-cpsI AGTGTGATTGTTCCAGTTTATAATTCGGAGT  
185 hp-285-cpsI GAGGTGCATCATCAGCAAGAAATGTG  
186 hp-286-cpsI ACAGATGGTAGTAAAGAGTTATGTGAGGAGA  
187 hp-287-cpsI TGAAGATGAACAAGTAGACTGGGTGCA  
188 hp-288-cpsI TCAAGAGCACTGCATAGTCGTAGATACG

## Labeling primers

157 lb-657-cpsH CTTCGCGTAATAAAATTCTACCAC  
158 lb-658-cpsH GAATAAAGTTAGGATGACCAAAACC  
159 lb-659-cpsH CTCTCCCTACTATACCTAATGTAGT  
160 lb-660-cpsH AGCCCTTCCCCTACTATACCA  
161 lb-661-cpsH TGAGTACCTCTAATGAGTATTGCA  
162 lb-662-cpsH TGAATAAAGTTGGGATGCCCA  
163 lb-663-cpsH TGATCACGAGTTTTCTTCTTTCA  
164 lb-664-cpsH AGATAGTAACGAGTTTTCTTCTTTCA  
165 lb-665-cpsH ATGATAACGAGTTTTCTTCTTTCAA  
166 lb-666-cpsH ACCTAAAGAAGTGGCACCA  
167 lb-667-cpsH ACATTTACGATATAGTTCTCAACAGT  
168 lb-668-cpsH CCATTGCTCTTTGAGTATGCA  
169 lb-669-cpsH TGGTAAAATAATAAGGACACAACCC  
170 lb-670-cpsH CACCATACATACTCAATAACATAGAGT  
171 lb-671-cylD CCTTTGTTAGTCATCACGTCA  
172 lb-672-cylF CTGATCTGATGTGCTCTAACAAG  
173 lb-673-cpsI GAGTTTTCGTTGAATTTCTGATTCA  
174 lb-674-cpsI TGTCCTACTGTAACCTATCTGAG  
175 lb-675-cpsI ACAATGTTTCGACGAAAGAAAGT  
176 lb-676-cpsI TCAGTTGAGCCATCACAACA  
177 lb-677-cpsI GGAATCCAAGAAAGCAATCCA  
178 lb-678-cpsI GCGATCACTAGAGCCATCA  
179 lb-679-cpsI GGAAACTCCATAAGTTTTCCCA  
180 lb-680-cpsI AGATTCTACACAGTTCTCAATCAC  
181 lb-681-cpsI TCACCTTCTGCCATCTCAAG  
182 lb-682-cpsI GCTTGATTGTCCTCCATTTGT  
183 lb-683-cpsI GCACATTATAGTATTCAGGTCCA  
184 lb-684-cpsI GAATTTTCGTTGAACTCCTGATTC  
185 lb-685-cpsI TGGATGAGTCTGTTGTAGTACG  
186 lb-686-cpsJ TCTCACTTTGAAATACTAAGTCTGG  
187 lb-687-cpsJ TCGCTTGCTAGATATGTTTGC  
188 lb-688-cpsJ CGATTAAACCACATTTAATTCCTGA

## Hybridisation Probes

|     |              |                                       |
|-----|--------------|---------------------------------------|
| 189 | hp-289-cpsI  | AGTAACAGTCATTATACCTATATACAACCTCAGAAGC |
| 190 | hp-290-cpsJ  | GGCTACATGCTGTAGAAGCACTTAAGGA          |
| 191 | hp-291-cpsJ  | TGTGATTGATAACCCCTGACAGAGAAGATGT       |
| 192 | hp-292-cpsJ  | GCTAGATGGATATAGAAACATTGTTCCCTGCA      |
| 193 | hp-293-cpsJ  | TGGATCGACTGATAATAGTATGAGCTACTGT       |
| 194 | hp-294-cpsJ  | AGTTTCTCATCTCATGGCATGTCTGGA           |
| 195 | hp-295-cpsJ  | CCAATTGGTAAACTACACGAGGATGAATTTACA     |
| 196 | hp-296-cpsJ  | AGACCATTATATGCCTATCGATTTCGAAGTG       |
| 197 | hp-297-cpsJ  | TGAGCCTTTAAATTATGTGAGAGATTCAGTAGAA    |
| 198 | hp-298-cpsJ  | AGCATCAAGTTTGAACAAAGCGGTGA            |
| 199 | hp-299-cpsJ  | TGGGTTGTCAGAAGCTAGAACTATGGA           |
| 200 | hp-300-cpsJ  | AGTTGAATGTATAGAAAGCCTTATTGTTCAAACA    |
| 201 | hp-301-cpsJ  | ACGTTCAATCTTTCCTAAACGAGTGTATAGA       |
| 202 | hp-302-cpsJ  | TGAATGTATAGATAGTGTTTTGGCTCAAACGT      |
| 203 | hp-303-cpsJ  | AGATTACATGCTATAGAAGCACTCCAGGA         |
| 204 | hp-304-cpsJ  | CAACAGTTTAATTGAGTATAAGGCTGATATTGCT    |
| 205 | hp-305-cpsK  | CCTTCAGACTATAATTGCTGAACGGATTATTGA     |
| 206 | hp-306-cpsK  | TGTGATACTATCCCTGATTATGGAGCTTGG        |
| 207 | hp-307-cpsK  | TGTGACACTATCACGGATTATGAAACTTGG        |
| 208 | hp-308-cpsK  | CCAAGTTATTCTTGGGTGGTTCTGTCTG          |
| 209 | hp-309-cpsK  | CTCCAAAGTCAGTATTATTGTTGACACAGC        |
| 210 | hp-310-cpsK  | GGAGCAGTAAGAGTTAGTATTAATCACCTTCAG     |
| 211 | hp-311-cpsK  | TCATGGCTTCAGTAAGTATTGTAAGACGATAGA     |
| 212 | hp-312-cpsK  | TGGAGCAGTAAAAGTTAGTATTAATTCACCTTCA    |
| 213 | hp-313-cpsE8 | AGTGCCATTACTGACTTTGAGGAAGTTG          |

## Labeling primers

|     |              |                             |
|-----|--------------|-----------------------------|
| 189 | lb-689-cpsJ  | TCTAAACCTTAAATCTTCGCATACT   |
| 190 | lb-690-cpsJ  | TGGATCACAAATTGCAAGATCC      |
| 191 | lb-691-cpsJ  | TGGTTCTGGTACAAAGGCT         |
| 192 | lb-692-cpsJ  | TGATAACCACTTCTTGTAATGCTC    |
| 193 | lb-693-cpsJ  | CCTCTACTTGGATTATCAATGACA    |
| 194 | lb-694-cpsJ  | TGAAATATCATCAGCATCCATTCT    |
| 195 | lb-695-cpsJ  | GGAAACTTTATCATCTGAATCAACA   |
| 196 | lb-696-cpsJ  | CCGTCGAACCATCATTAATCA       |
| 197 | lb-697-cpsJ  | CGGAATTATCTGTAGAGCCATC      |
| 198 | lb-698-cpsJ  | GTATCCGTAGAGCCATCATCA       |
| 199 | lb-699-cpsJ  | CACITTTGAAATACTAACTCTGGGT   |
| 200 | lb-700-cpsJ  | GTTCTTTGGAATTTGCCAAATGA     |
| 201 | lb-701-cpsK  | CTTCAAATGATTCAATTGGGAAACA   |
| 202 | lb-702-cpsK  | CTGTTCCCGATAATCTAGCTCT      |
| 203 | lb-703-cpsK  | ACTTTGAAACCTCTCTGTAGGT      |
| 204 | lb-704-cpsK  | TGTTCTTCGGACGTTTCTATCT      |
| 205 | lb-705-cpsK  | CTGTTGGTAAATCTTTCAAACACTACT |
| 206 | lb-706-cpsK  | CCACTAAAGAATTAACCTCAATTGA   |
| 207 | lb-707-cpsK  | GATTCAGTTCTTATTCCCTGATCA    |
| 208 | lb-708-cpsE8 | TCTTAATATCTTCTGACAATGACCA   |

**Supplemental file 3: *S. agalactiae* MLST profiles as of June 2014.**

| <b>ST</b> | <b><i>adhP</i></b> | <b><i>pheS</i></b> | <b><i>atr</i></b> | <b><i>glnA</i></b> | <b><i>sdhA</i></b> | <b><i>glcK</i></b> | <b><i>tkt</i></b> |
|-----------|--------------------|--------------------|-------------------|--------------------|--------------------|--------------------|-------------------|
| 1         | 1                  | 1                  | 2                 | 1                  | 1                  | 2                  | 2                 |
| 2         | 1                  | 1                  | 3                 | 1                  | 1                  | 2                  | 2                 |
| 3         | 1                  | 1                  | 4                 | 1                  | 1                  | 3                  | 2                 |
| 4         | 1                  | 1                  | 4                 | 1                  | 1                  | 3                  | 4                 |
| 5         | 12                 | 1                  | 4                 | 1                  | 1                  | 3                  | 4                 |
| 6         | 9                  | 1                  | 2                 | 1                  | 3                  | 2                  | 2                 |
| 7         | 10                 | 1                  | 2                 | 1                  | 3                  | 2                  | 2                 |
| 8         | 4                  | 1                  | 4                 | 1                  | 3                  | 3                  | 2                 |
| 9         | 8                  | 1                  | 4                 | 1                  | 3                  | 3                  | 2                 |
| 10        | 9                  | 1                  | 4                 | 1                  | 3                  | 3                  | 2                 |
| 11        | 9                  | 3                  | 7                 | 1                  | 3                  | 3                  | 2                 |
| 12        | 10                 | 1                  | 4                 | 1                  | 3                  | 3                  | 2                 |
| 13        | 11                 | 3                  | 4                 | 1                  | 3                  | 3                  | 2                 |
| 14        | 1                  | 1                  | 2                 | 1                  | 5                  | 2                  | 2                 |
| 15        | 9                  | 1                  | 4                 | 1                  | 5                  | 3                  | 2                 |
| 16        | 1                  | 1                  | 4                 | 1                  | 6                  | 3                  | 4                 |
| 17        | 2                  | 1                  | 1                 | 2                  | 1                  | 1                  | 1                 |
| 18        | 3                  | 1                  | 1                 | 2                  | 1                  | 1                  | 1                 |
| 19        | 1                  | 1                  | 3                 | 2                  | 2                  | 2                  | 2                 |
| 20        | 1                  | 2                  | 3                 | 2                  | 2                  | 2                  | 2                 |
| 21        | 1                  | 9                  | 3                 | 2                  | 2                  | 2                  | 2                 |
| 22        | 13                 | 3                  | 1                 | 3                  | 1                  | 1                  | 1                 |
| 23        | 5                  | 4                  | 6                 | 3                  | 2                  | 1                  | 3                 |
| 24        | 5                  | 4                  | 4                 | 3                  | 2                  | 3                  | 3                 |
| 25        | 5                  | 4                  | 6                 | 3                  | 8                  | 1                  | 3                 |
| 26        | 1                  | 1                  | 5                 | 4                  | 1                  | 4                  | 6                 |
| 27        | 1                  | 1                  | 3                 | 4                  | 2                  | 2                  | 2                 |
| 28        | 1                  | 1                  | 3                 | 5                  | 2                  | 2                  | 2                 |
| 29        | 2                  | 1                  | 1                 | 8                  | 1                  | 1                  | 1                 |
| 30        | 1                  | 1                  | 8                 | 2                  | 2                  | 2                  | 2                 |
| 31        | 2                  | 1                  | 1                 | 6                  | 1                  | 1                  | 1                 |
| 32        | 2                  | 1                  | 1                 | 2                  | 7                  | 1                  | 1                 |
| 33        | 5                  | 6                  | 4                 | 3                  | 2                  | 1                  | 3                 |
| 34        | 5                  | 7                  | 6                 | 3                  | 2                  | 1                  | 3                 |
| 35        | 1                  | 1                  | 3                 | 2                  | 2                  | 5                  | 2                 |
| 36        | 1                  | 1                  | 3                 | 2                  | 2                  | 2                  | 7                 |
| 37        | 13                 | 3                  | 9                 | 3                  | 1                  | 1                  | 1                 |
| 38        | 9                  | 1                  | 10                | 1                  | 3                  | 2                  | 2                 |
| 39        | 13                 | 3                  | 11                | 3                  | 1                  | 1                  | 1                 |
| 40        | 13                 | 3                  | 1                 | 3                  | 1                  | 7                  | 1                 |
| 41        | 10                 | 1                  | 12                | 1                  | 3                  | 2                  | 2                 |
| 42        | 1                  | 1                  | 3                 | 2                  | 3                  | 2                  | 2                 |
| 43        | 10                 | 1                  | 4                 | 1                  | 2                  | 3                  | 2                 |
| 44        | 1                  | 1                  | 3                 | 2                  | 1                  | 2                  | 2                 |
| 45        | 13                 | 3                  | 1                 | 3                  | 3                  | 1                  | 1                 |
| 46        | 1                  | 1                  | 4                 | 1                  | 3                  | 3                  | 4                 |
| 47        | 9                  | 1                  | 4                 | 1                  | 1                  | 3                  | 2                 |
| 48        | 2                  | 1                  | 1                 | 2                  | 2                  | 1                  | 1                 |
| 49        | 1                  | 1                  | 2                 | 1                  | 2                  | 2                  | 2                 |
| 50        | 1                  | 1                  | 2                 | 11                 | 1                  | 2                  | 2                 |
| 51        | 10                 | 1                  | 3                 | 1                  | 3                  | 2                  | 2                 |
| 52        | 5                  | 4                  | 6                 | 3                  | 1                  | 1                  | 3                 |
| 53        | 4                  | 1                  | 4                 | 1                  | 1                  | 3                  | 2                 |
| 54        | 1                  | 1                  | 4                 | 1                  | 9                  | 3                  | 4                 |
| 55        | 5                  | 1                  | 6                 | 3                  | 2                  | 1                  | 3                 |
| 56        | 1                  | 1                  | 2                 | 1                  | 2                  | 8                  | 2                 |
| 57        | 1                  | 1                  | 13                | 1                  | 2                  | 2                  | 2                 |
| 58        | 16                 | 1                  | 6                 | 2                  | 2                  | 9                  | 2                 |



| ST  | <i>adhP</i> | <i>pheS</i> | <i>atr</i> | <i>glnA</i> | <i>sdhA</i> | <i>glcK</i> | <i>tkt</i> |
|-----|-------------|-------------|------------|-------------|-------------|-------------|------------|
| 59  | 1           | 1           | 3          | 4           | 2           | 2           | 5          |
| 60  | 16          | 1           | 6          | 2           | 1           | 9           | 2          |
| 61  | 13          | 1           | 1          | 13          | 1           | 1           | 1          |
| 62  | 13          | 1           | 1          | 13          | 11          | 1           | 5          |
| 63  | 13          | 1           | 1          | 2           | 1           | 10          | 1          |
| 64  | 13          | 1           | 1          | 2           | 1           | 1           | 1          |
| 65  | 9           | 11          | 4          | 1           | 3           | 3           | 2          |
| 66  | 1           | 1           | 3          | 14          | 1           | 12          | 2          |
| 67  | 13          | 1           | 1          | 13          | 1           | 1           | 5          |
| 68  | 1           | 1           | 3          | 1           | 11          | 2           | 2          |
| 69  | 13          | 1           | 1          | 16          | 1           | 1           | 5          |
| 70  | 2           | 1           | 1          | 2           | 13          | 1           | 1          |
| 71  | 1           | 1           | 2          | 1           | 1           | 2           | 8          |
| 72  | 13          | 1           | 1          | 13          | 1           | 2           | 5          |
| 73  | 13          | 1           | 1          | 13          | 14          | 9           | 5          |
| 74  | 13          | 1           | 1          | 13          | 1           | 13          | 5          |
| 75  | 13          | 1           | 14         | 13          | 1           | 1           | 5          |
| 76  | 13          | 1           | 1          | 13          | 1           | 14          | 1          |
| 77  | 13          | 1           | 1          | 13          | 1           | 14          | 5          |
| 78  | 9           | 1           | 4          | 1           | 3           | 11          | 2          |
| 79  | 13          | 1           | 1          | 13          | 14          | 1           | 5          |
| 80  | 19          | 1           | 1          | 13          | 1           | 1           | 5          |
| 81  | 1           | 12          | 3          | 2           | 2           | 1           | 2          |
| 82  | 20          | 13          | 15         | 1           | 15          | 1           | 5          |
| 83  | 2           | 1           | 1          | 2           | 14          | 1           | 1          |
| 84  | 10          | 1           | 2          | 1           | 3           | 1           | 2          |
| 85  | 13          | 1           | 17         | 15          | 1           | 1           | 5          |
| 86  | 1           | 1           | 3          | 2           | 2           | 1           | 2          |
| 87  | 18          | 1           | 3          | 2           | 2           | 2           | 2          |
| 88  | 5           | 10          | 6          | 3           | 2           | 1           | 3          |
| 89  | 10          | 1           | 19         | 1           | 3           | 2           | 2          |
| 90  | 5           | 4           | 6          | 19          | 2           | 1           | 3          |
| 91  | 25          | 1           | 1          | 13          | 1           | 15          | 1          |
| 92  | 26          | 4           | 6          | 3           | 2           | 1           | 3          |
| 93  | 9           | 4           | 4          | 1           | 18          | 3           | 4          |
| 94  | 5           | 4           | 18         | 3           | 2           | 1           | 3          |
| 95  | 2           | 1           | 1          | 12          | 1           | 1           | 1          |
| 96  | 1           | 1           | 3          | 5           | 10          | 2           | 2          |
| 97  | 1           | 1           | 2          | 18          | 1           | 2           | 2          |
| 98  | 1           | 1           | 3          | 20          | 2           | 2           | 2          |
| 99  | 1           | 1           | 20         | 2           | 2           | 2           | 2          |
| 100 | 13          | 1           | 1          | 13          | 1           | 17          | 5          |
| 101 | 13          | 1           | 1          | 13          | 1           | 18          | 5          |
| 102 | 24          | 10          | 6          | 3           | 2           | 1           | 3          |
| 103 | 16          | 1           | 6          | 2           | 9           | 9           | 2          |
| 104 | 21          | 1           | 4          | 1           | 5           | 3           | 2          |
| 105 | 27          | 1           | 1          | 13          | 1           | 16          | 1          |
| 106 | 1           | 1           | 3          | 4           | 2           | 5           | 2          |
| 107 | 15          | 1           | 3          | 2           | 2           | 2           | 2          |
| 108 | 2           | 1           | 1          | 2           | 1           | 6           | 1          |
| 109 | 2           | 1           | 1          | 10          | 1           | 1           | 1          |
| 110 | 1           | 1           | 3          | 2           | 2           | 2           | 9          |
| 111 | 28          | 1           | 1          | 2           | 1           | 1           | 1          |
| 112 | 1           | 1           | 3          | 2           | 17          | 2           | 2          |
| 113 | 22          | 1           | 4          | 1           | 3           | 3           | 2          |
| 114 | 15          | 4           | 6          | 3           | 2           | 1           | 3          |
| 115 | 23          | 1           | 1          | 2           | 1           | 1           | 1          |
| 116 | 4           | 14          | 4          | 1           | 3           | 3           | 2          |
| 117 | 30          | 1           | 3          | 1           | 1           | 2           | 2          |
| 118 | 31          | 1           | 4          | 1           | 3           | 3           | 2          |
| 119 | 2           | 1           | 21         | 2           | 1           | 1           | 1          |
| 120 | 2           | 15          | 1          | 2           | 1           | 1           | 1          |
| 121 | 32          | 1           | 3          | 2           | 2           | 2           | 2          |

| ST  | <i>adhP</i> | <i>pheS</i> | <i>atr</i> | <i>glnA</i> | <i>sdhA</i> | <i>glcK</i> | <i>tkt</i> |
|-----|-------------|-------------|------------|-------------|-------------|-------------|------------|
| 122 | 1           | 1           | 3          | 2           | 2           | 19          | 2          |
| 123 | 1           | 1           | 23         | 2           | 2           | 2           | 2          |
| 124 | 1           | 1           | 22         | 2           | 2           | 2           | 2          |
| 125 | 2           | 1           | 1          | 2           | 19          | 1           | 1          |
| 126 | 2           | 1           | 1          | 2           | 1           | 1           | 10         |
| 127 | 1           | 1           | 4          | 4           | 1           | 3           | 6          |
| 128 | 2           | 1           | 1          | 19          | 1           | 1           | 1          |
| 129 | 2           | 1           | 1          | 2           | 21          | 20          | 1          |
| 130 | 9           | 8           | 4          | 1           | 5           | 3           | 4          |
| 131 | 1           | 1           | 3          | 2           | 2           | 3           | 2          |
| 132 | 5           | 4           | 24         | 3           | 2           | 1           | 3          |
| 133 | 2           | 1           | 1          | 9           | 1           | 1           | 1          |
| 134 | 29          | 1           | 4          | 1           | 3           | 3           | 2          |
| 135 | 1           | 1           | 3          | 23          | 2           | 2           | 2          |
| 136 | 1           | 1           | 3          | 1           | 22          | 12          | 2          |
| 137 | 14          | 1           | 1          | 2           | 1           | 1           | 1          |
| 138 | 1           | 1           | 4          | 2           | 2           | 2           | 2          |
| 139 | 1           | 1           | 4          | 1           | 1           | 2           | 2          |
| 140 | 9           | 1           | 1          | 1           | 3           | 2           | 2          |
| 141 | 9           | 5           | 2          | 1           | 3           | 2           | 2          |
| 142 | 2           | 1           | 1          | 21          | 1           | 1           | 1          |
| 143 | 5           | 10          | 6          | 3           | 23          | 1           | 3          |
| 144 | 5           | 4           | 1          | 3           | 2           | 1           | 3          |
| 145 | 33          | 4           | 6          | 3           | 2           | 1           | 3          |
| 146 | 2           | 1           | 1          | 1           | 1           | 1           | 1          |
| 147 | 2           | 1           | 1          | 22          | 1           | 1           | 1          |
| 148 | 2           | 1           | 1          | 24          | 1           | 1           | 1          |
| 149 | 1           | 1           | 3          | 2           | 2           | 2           | 11         |
| 150 | 2           | 1           | 1          | 2           | 1           | 1           | 12         |
| 151 | 34          | 1           | 2          | 1           | 1           | 2           | 2          |
| 152 | 37          | 1           | 3          | 2           | 2           | 2           | 2          |
| 153 | 36          | 1           | 2          | 1           | 1           | 2           | 2          |
| 154 | 35          | 1           | 3          | 2           | 2           | 2           | 2          |
| 155 | 13          | 3           | 1          | 3           | 24          | 1           | 1          |
| 156 | 1           | 1           | 1          | 1           | 1           | 2           | 2          |
| 157 | 9           | 1           | 1          | 1           | 3           | 3           | 2          |
| 158 | 1           | 1           | 6          | 2           | 2           | 2           | 2          |
| 159 | 10          | 1           | 1          | 3           | 3           | 3           | 2          |
| 160 | 9           | 5           | 6          | 1           | 3           | 3           | 2          |
| 161 | 5           | 4           | 2          | 3           | 2           | 1           | 3          |
| 162 | 5           | 4           | 3          | 3           | 2           | 3           | 3          |
| 163 | 5           | 4           | 4          | 3           | 2           | 1           | 3          |
| 164 | 1           | 1           | 2          | 2           | 2           | 2           | 2          |
| 165 | 9           | 1           | 6          | 1           | 3           | 3           | 2          |
| 166 | 5           | 4           | 3          | 3           | 2           | 1           | 3          |
| 167 | 1           | 1           | 6          | 1           | 1           | 2           | 2          |
| 168 | 13          | 3           | 4          | 25          | 1           | 1           | 1          |
| 169 | 13          | 3           | 4          | 3           | 1           | 1           | 1          |
| 170 | 2           | 1           | 2          | 2           | 1           | 1           | 1          |
| 171 | 2           | 1           | 3          | 2           | 1           | 1           | 1          |
| 172 | 1           | 1           | 3          | 1           | 1           | 3           | 4          |
| 173 | 38          | 1           | 2          | 1           | 1           | 2           | 2          |
| 174 | 2           | 1           | 1          | 3           | 1           | 1           | 1          |
| 175 | 1           | 1           | 3          | 3           | 2           | 2           | 2          |
| 176 | 1           | 1           | 3          | 2           | 2           | 9           | 2          |
| 177 | 2           | 1           | 1          | 6           | 2           | 1           | 1          |
| 178 | 1           | 1           | 3          | 2           | 2           | 2           | 3          |
| 179 | 2           | 1           | 1          | 2           | 1           | 1           | 3          |
| 180 | 2           | 4           | 1          | 2           | 1           | 1           | 1          |
| 181 | 30          | 1           | 3          | 2           | 2           | 2           | 2          |
| 182 | 1           | 1           | 3          | 2           | 18          | 2           | 2          |
| 183 | 48          | 1           | 2          | 1           | 1           | 2           | 2          |
| 184 | 1           | 4           | 2          | 1           | 2           | 2           | 3          |

| ST  | <i>adhP</i> | <i>pheS</i> | <i>atr</i> | <i>glnA</i> | <i>sdhA</i> | <i>glcK</i> | <i>tkt</i> |
|-----|-------------|-------------|------------|-------------|-------------|-------------|------------|
| 185 | 2           | 4           | 1          | 2           | 2           | 1           | 3          |
| 186 | 1           | 1           | 2          | 1           | 1           | 2           | 5          |
| 187 | 5           | 1           | 6          | 2           | 2           | 2           | 3          |
| 188 | 2           | 1           | 1          | 2           | 1           | 1           | 2          |
| 189 | 13          | 4           | 1          | 3           | 1           | 1           | 1          |
| 190 | 1           | 4           | 3          | 2           | 2           | 2           | 2          |
| 191 | 2           | 4           | 1          | 12          | 1           | 1           | 1          |
| 192 | 2           | 1           | 16         | 6           | 1           | 1           | 1          |
| 193 | 1           | 1           | 3          | 2           | 2           | 2           | 1          |
| 194 | 39          | 1           | 1          | 2           | 1           | 1           | 1          |
| 195 | 9           | 1           | 1          | 1           | 3           | 2           | 1          |
| 196 | 1           | 1           | 3          | 1           | 1           | 12          | 2          |
| 197 | 1           | 1           | 3          | 1           | 2           | 2           | 2          |
| 198 | 13          | 4           | 6          | 3           | 2           | 1           | 3          |
| 199 | 5           | 4           | 6          | 3           | 2           | 1           | 2          |
| 200 | 9           | 1           | 4          | 1           | 3           | 3           | 5          |
| 201 | 2           | 1           | 25         | 2           | 1           | 1           | 1          |
| 202 | 40          | 1           | 3          | 1           | 1           | 2           | 2          |
| 203 | 5           | 4           | 6          | 3           | 2           | 3           | 1          |
| 204 | 1           | 1           | 4          | 3           | 1           | 3           | 3          |
| 205 | 5           | 4           | 1          | 3           | 2           | 2           | 1          |
| 206 | 5           | 4           | 1          | 3           | 2           | 1           | 1          |
| 207 | 1           | 1           | 2          | 1           | 2           | 2           | 3          |
| 208 | 1           | 1           | 6          | 1           | 2           | 2           | 3          |
| 209 | 1           | 1           | 10         | 1           | 2           | 2           | 3          |
| 210 | 5           | 4           | 6          | 3           | 2           | 1           | 14         |
| 211 | 5           | 4           | 6          | 3           | 2           | 22          | 3          |
| 212 | 5           | 4           | 6          | 3           | 2           | 1           | 15         |
| 213 | 43          | 4           | 6          | 3           | 2           | 1           | 3          |
| 214 | 44          | 4           | 6          | 3           | 2           | 1           | 3          |
| 215 | 5           | 4           | 26         | 3           | 2           | 1           | 3          |
| 216 | 5           | 4           | 27         | 3           | 2           | 1           | 3          |
| 217 | 1           | 1           | 2          | 1           | 1           | 2           | 13         |
| 218 | 41          | 1           | 3          | 2           | 2           | 2           | 2          |
| 219 | 42          | 1           | 3          | 2           | 2           | 2           | 2          |
| 220 | 1           | 4           | 6          | 3           | 2           | 1           | 3          |
| 221 | 5           | 4           | 6          | 3           | 2           | 2           | 3          |
| 222 | 5           | 4           | 6          | 3           | 2           | 1           | 4          |
| 223 | 5           | 4           | 6          | 3           | 2           | 1           | 1          |
| 224 | 5           | 10          | 6          | 1           | 2           | 1           | 4          |
| 225 | 1           | 10          | 4          | 1           | 1           | 3           | 3          |
| 226 | 16          | 1           | 2          | 2           | 9           | 1           | 2          |
| 227 | 4           | 1           | 4          | 3           | 3           | 3           | 3          |
| 228 | 5           | 1           | 2          | 1           | 1           | 2           | 2          |
| 229 | 2           | 1           | 1          | 6           | 1           | 1           | 10         |
| 230 | 8           | 1           | 28         | 1           | 3           | 23          | 2          |
| 231 | 1           | 1           | 2          | 1           | 1           | 24          | 2          |
| 232 | 45          | 1           | 3          | 2           | 2           | 2           | 2          |
| 233 | 46          | 1           | 3          | 2           | 2           | 2           | 2          |
| 234 | 5           | 4           | 6          | 3           | 2           | 1           | 16         |
| 235 | 47          | 1           | 2          | 1           | 1           | 2           | 2          |
| 236 | 4           | 1           | 2          | 1           | 1           | 3           | 2          |
| 237 | 2           | 1           | 1          | 2           | 1           | 1           | 17         |
| 238 | 4           | 1           | 2          | 1           | 1           | 2           | 2          |
| 239 | 10          | 1           | 4          | 1           | 3           | 3           | 18         |
| 240 | 9           | 8           | 4          | 1           | 3           | 3           | 4          |
| 241 | 1           | 16          | 3          | 2           | 2           | 2           | 2          |
| 242 | 1           | 1           | 29         | 26          | 1           | 2           | 2          |
| 243 | 1           | 1           | 4          | 1           | 25          | 3           | 4          |
| 244 | 2           | 1           | 30         | 2           | 1           | 1           | 1          |
| 245 | 46          | 1           | 4          | 1           | 3           | 3           | 2          |
| 246 | 49          | 17          | 31         | 4           | 26          | 25          | 19         |
| 247 | 13          | 1           | 2          | 2           | 27          | 9           | 1          |

| ST  | <i>adhP</i> | <i>pheS</i> | <i>atr</i> | <i>glnA</i> | <i>sdhA</i> | <i>glcK</i> | <i>tkt</i> |
|-----|-------------|-------------|------------|-------------|-------------|-------------|------------|
| 248 | 16          | 18          | 2          | 2           | 9           | 2           | 2          |
| 249 | 5           | 4           | 6          | 1           | 2           | 1           | 3          |
| 250 | 1           | 1           | 3          | 1           | 12          | 2           | 2          |
| 251 | 1           | 1           | 2          | 27          | 1           | 2           | 2          |
| 252 | 50          | 1           | 2          | 2           | 1           | 1           | 1          |
| 253 | 5           | 19          | 6          | 3           | 2           | 1           | 3          |
| 254 | 9           | 1           | 3          | 2           | 2           | 2           | 2          |
| 255 | 9           | 1           | 2          | 2           | 3           | 2           | 2          |
| 256 | 51          | 1           | 5          | 4           | 1           | 4           | 6          |
| 257 | 52          | 17          | 31         | 4           | 26          | 2           | 19         |
| 258 | 10          | 17          | 2          | 2           | 26          | 26          | 2          |
| 259 | 52          | 17          | 31         | 28          | 26          | 26          | 2          |
| 260 | 52          | 17          | 31         | 28          | 26          | 26          | 19         |
| 261 | 54          | 17          | 31         | 4           | 26          | 25          | 19         |
| 262 | 5           | 4           | 32         | 3           | 2           | 1           | 3          |
| 263 | 1           | 1           | 33         | 1           | 1           | 2           | 2          |
| 264 | 4           | 1           | 4          | 1           | 3           | 3           | 20         |
| 265 | 53          | 1           | 4          | 1           | 3           | 3           | 2          |
| 266 | 1           | 1           | 3          | 29          | 28          | 2           | 2          |
| 267 | 32          | 1           | 3          | 5           | 2           | 2           | 2          |
| 268 | 10          | 1           | 4          | 2           | 3           | 3           | 2          |
| 269 | 13          | 3           | 1          | 3           | 1           | 1           | 2          |
| 270 | 13          | 1           | 1          | 3           | 1           | 1           | 1          |
| 271 | 13          | 1           | 1          | 2           | 1           | 1           | 5          |
| 272 | 10          | 1           | 4          | 1           | 3           | 3           | 21         |
| 273 | 4           | 22          | 4          | 1           | 3           | 3           | 2          |
| 274 | 1           | 21          | 3          | 2           | 2           | 2           | 9          |
| 275 | 4           | 1           | 4          | 31          | 3           | 3           | 2          |
| 276 | 5           | 20          | 6          | 30          | 2           | 1           | 3          |
| 277 | 55          | 1           | 2          | 1           | 1           | 2           | 2          |
| 278 | 2           | 1           | 1          | 2           | 1           | 27          | 1          |
| 279 | 5           | 4           | 6          | 3           | 30          | 1           | 3          |
| 280 | 5           | 4           | 6          | 3           | 29          | 1           | 3          |
| 281 | 57          | 1           | 2          | 1           | 1           | 2           | 5          |
| 282 | 2           | 24          | 1          | 2           | 1           | 1           | 1          |
| 283 | 9           | 5           | 7          | 1           | 3           | 3           | 2          |
| 284 | 59          | 10          | 6          | 3           | 2           | 1           | 3          |
| 285 | 1           | 1           | 36         | 2           | 2           | 2           | 2          |
| 286 | 1           | 1           | 37         | 2           | 2           | 2           | 2          |
| 287 | 2           | 1           | 1          | 2           | 1           | 31          | 1          |
| 288 | 1           | 1           | 4          | 1           | 1           | 30          | 2          |
| 289 | 1           | 1           | 3          | 36          | 2           | 2           | 9          |
| 290 | 2           | 26          | 1          | 2           | 1           | 1           | 1          |
| 291 | 2           | 25          | 1          | 2           | 1           | 1           | 1          |
| 292 | 1           | 1           | 3          | 5           | 32          | 2           | 2          |
| 293 | 1           | 1           | 3          | 1           | 1           | 2           | 5          |
| 294 | 60          | 1           | 3          | 2           | 2           | 2           | 2          |
| 295 | 58          | 1           | 3          | 2           | 2           | 2           | 2          |
| 296 | 8           | 1           | 4          | 1           | 3           | 23          | 2          |
| 297 | 1           | 1           | 2          | 2           | 1           | 2           | 2          |
| 298 | 13          | 1           | 2          | 3           | 1           | 1           | 5          |
| 299 | 61          | 1           | 4          | 1           | 1           | 3           | 4          |
| 300 | 56          | 23          | 34         | 37          | 3           | 9           | 4          |
| 301 | 13          | 1           | 1          | 13          | 1           | 28          | 5          |
| 302 | 56          | 23          | 6          | 33          | 3           | 9           | 4          |
| 303 | 56          | 23          | 35         | 37          | 3           | 9           | 4          |
| 304 | 9           | 1           | 2          | 4           | 3           | 2           | 2          |
| 305 | 5           | 4           | 6          | 32          | 2           | 1           | 3          |
| 306 | 1           | 1           | 3          | 1           | 12          | 2           | 1          |
| 307 | 5           | 7           | 6          | 3           | 2           | 1           | 1          |
| 308 | 1           | 1           | 2          | 34          | 1           | 29          | 3          |
| 309 | 13          | 1           | 1          | 2           | 1           | 9           | 1          |
| 310 | 13          | 1           | 1          | 13          | 1           | 9           | 1          |

| ST  | <i>adhP</i> | <i>pheS</i> | <i>atr</i> | <i>glnA</i> | <i>sdhA</i> | <i>glcK</i> | <i>tkt</i> |
|-----|-------------|-------------|------------|-------------|-------------|-------------|------------|
| 311 | 5           | 4           | 6          | 35          | 2           | 1           | 3          |
| 312 | 13          | 1           | 1          | 13          | 1           | 9           | 5          |
| 313 | 13          | 1           | 1          | 2           | 1           | 28          | 5          |
| 314 | 16          | 1           | 2          | 2           | 9           | 2           | 2          |
| 315 | 2           | 1           | 1          | 2           | 31          | 1           | 1          |
| 316 | 63          | 1           | 1          | 2           | 1           | 1           | 1          |
| 317 | 1           | 1           | 2          | 1           | 33          | 2           | 2          |
| 318 | 1           | 1           | 2          | 3           | 1           | 1           | 2          |
| 319 | 2           | 1           | 1          | 2           | 1           | 1           | 22         |
| 320 | 5           | 4           | 6          | 3           | 2           | 1           | 23         |
| 321 | 64          | 1           | 2          | 1           | 1           | 2           | 2          |
| 322 | 5           | 4           | 4          | 3           | 2           | 3           | 2          |
| 323 | 1           | 1           | 39         | 4           | 1           | 4           | 6          |
| 324 | 1           | 1           | 40         | 2           | 2           | 2           | 2          |
| 325 | 5           | 4           | 6          | 4           | 2           | 1           | 3          |
| 326 | 5           | 4           | 41         | 3           | 2           | 3           | 3          |
| 327 | 1           | 1           | 4          | 2           | 20          | 3           | 2          |
| 328 | 1           | 1           | 4          | 2           | 2           | 3           | 2          |
| 329 | 2           | 1           | 1          | 38          | 1           | 1           | 1          |
| 330 | 1           | 27          | 4          | 2           | 2           | 3           | 2          |
| 331 | 1           | 1           | 3          | 5           | 2           | 2           | 3          |
| 332 | 4           | 1           | 3          | 1           | 3           | 3           | 2          |
| 333 | 1           | 1           | 3          | 1           | 1           | 12          | 5          |
| 334 | 5           | 4           | 42         | 3           | 2           | 1           | 3          |
| 335 | 1           | 1           | 43         | 2           | 2           | 2           | 2          |
| 336 | 1           | 1           | 44         | 2           | 2           | 32          | 2          |
| 337 | 13          | 1           | 1          | 13          | 1           | 2           | 1          |
| 338 | 56          | 23          | 6          | 33          | 3           | 9           | 24         |
| 339 | 13          | 1           | 1          | 13          | 1           | 34          | 5          |
| 340 | 56          | 23          | 34         | 37          | 3           | 9           | 24         |
| 341 | 13          | 1           | 1          | 2           | 1           | 1           | 4          |
| 342 | 1           | 1           | 2          | 34          | 1           | 29          | 2          |
| 343 | 13          | 1           | 1          | 2           | 27          | 9           | 1          |
| 344 | 56          | 23          | 35         | 37          | 3           | 9           | 24         |
| 345 | 62          | 1           | 2          | 1           | 1           | 22          | 2          |
| 346 | 1           | 1           | 45         | 1           | 1           | 2           | 2          |
| 347 | 65          | 1           | 3          | 5           | 2           | 2           | 2          |
| 348 | 1           | 1           | 3          | 2           | 16          | 2           | 2          |
| 349 | 35          | 1           | 2          | 1           | 1           | 2           | 2          |
| 350 | 9           | 1           | 4          | 39          | 3           | 3           | 2          |
| 351 | 66          | 1           | 3          | 2           | 2           | 2           | 2          |
| 352 | 1           | 1           | 1          | 40          | 1           | 1           | 2          |
| 353 | 10          | 15          | 12         | 1           | 3           | 2           | 2          |
| 354 | 13          | 1           | 1          | 13          | 1           | 1           | 25         |
| 355 | 2           | 1           | 46         | 2           | 1           | 1           | 1          |
| 356 | 13          | 1           | 2          | 41          | 1           | 1           | 5          |
| 357 | 2           | 1           | 1          | 2           | 1           | 3           | 1          |
| 358 | 1           | 1           | 4          | 1           | 3           | 3           | 2          |
| 359 | 2           | 1           | 1          | 2           | 1           | 35          | 1          |
| 360 | 2           | 1           | 1          | 2           | 1           | 36          | 1          |
| 361 | 10          | 1           | 4          | 1           | 1           | 3           | 2          |
| 362 | 4           | 1           | 4          | 1           | 2           | 3           | 2          |
| 363 | 67          | 1           | 47         | 1           | 3           | 2           | 2          |
| 364 | 1           | 1           | 2          | 1           | 1           | 2           | 26         |
| 365 | 1           | 1           | 5          | 4           | 3           | 4           | 27         |
| 366 | 5           | 4           | 6          | 3           | 35          | 1           | 3          |
| 367 | 68          | 1           | 2          | 1           | 1           | 2           | 2          |
| 368 | 1           | 1           | 3          | 5           | 2           | 1           | 2          |
| 369 | 1           | 1           | 48         | 4           | 2           | 2           | 2          |
| 370 | 1           | 1           | 2          | 1           | 1           | 1           | 2          |
| 371 | 1           | 1           | 6          | 1           | 1           | 1           | 2          |
| 372 | 69          | 1           | 4          | 1           | 3           | 3           | 2          |
| 373 | 70          | 1           | 4          | 1           | 3           | 3           | 2          |

| ST  | <i>adhP</i> | <i>pheS</i> | <i>atr</i> | <i>glnA</i> | <i>sdhA</i> | <i>glcK</i> | <i>tkt</i> |
|-----|-------------|-------------|------------|-------------|-------------|-------------|------------|
| 374 | 10          | 1           | 49         | 1           | 3           | 3           | 2          |
| 375 | 1           | 1           | 2          | 1           | 1           | 2           | 28         |
| 376 | 2           | 1           | 1          | 2           | 36          | 1           | 1          |
| 377 | 1           | 1           | 4          | 5           | 2           | 2           | 2          |
| 378 | 1           | 1           | 3          | 1           | 1           | 2           | 29         |
| 379 | 1           | 1           | 3          | 2           | 34          | 2           | 2          |
| 380 | 5           | 28          | 6          | 3           | 2           | 1           | 3          |
| 381 | 71          | 1           | 4          | 1           | 3           | 3           | 2          |
| 382 | 72          | 1           | 3          | 2           | 2           | 2           | 2          |
| 383 | 1           | 1           | 2          | 42          | 1           | 2           | 2          |
| 384 | 2           | 1           | 1          | 2           | 1           | 37          | 1          |
| 385 | 5           | 4           | 6          | 3           | 2           | 1           | 30         |
| 386 | 15          | 1           | 3          | 5           | 2           | 2           | 2          |
| 387 | 1           | 1           | 2          | 1           | 1           | 3           | 2          |
| 388 | 1           | 1           | 5          | 1           | 1           | 4           | 6          |
| 389 | 1           | 1           | 3          | 2           | 2           | 2           | 5          |
| 390 | 4           | 1           | 4          | 1           | 3           | 9           | 2          |
| 391 | 1           | 1           | 6          | 3           | 2           | 1           | 3          |
| 392 | 1           | 1           | 3          | 43          | 2           | 2           | 2          |
| 393 | 1           | 1           | 3          | 2           | 2           | 2           | 31         |
| 394 | 73          | 1           | 2          | 1           | 1           | 2           | 2          |
| 395 | 1           | 1           | 50         | 2           | 2           | 2           | 2          |
| 396 | 1           | 1           | 3          | 2           | 10          | 2           | 2          |
| 397 | 5           | 25          | 4          | 1           | 2           | 1           | 3          |
| 398 | 1           | 1           | 4          | 1           | 1           | 4           | 2          |
| 399 | 10          | 1           | 4          | 1           | 3           | 1           | 2          |
| 400 | 12          | 1           | 4          | 1           | 3           | 3           | 2          |
| 401 | 1           | 8           | 4          | 1           | 5           | 3           | 2          |
| 402 | 2           | 1           | 3          | 1           | 3           | 2           | 2          |
| 403 | 5           | 4           | 6          | 3           | 2           | 2           | 2          |
| 404 | 5           | 1           | 3          | 2           | 2           | 1           | 3          |
| 405 | 2           | 1           | 4          | 2           | 1           | 1           | 2          |
| 406 | 5           | 4           | 6          | 6           | 2           | 1           | 3          |
| 407 | 13          | 3           | 1          | 1           | 1           | 1           | 1          |
| 408 | 1           | 1           | 51         | 2           | 2           | 2           | 2          |
| 409 | 1           | 1           | 3          | 2           | 37          | 1           | 2          |
| 410 | 5           | 10          | 3          | 2           | 2           | 2           | 2          |
| 411 | 30          | 1           | 2          | 1           | 1           | 2           | 2          |
| 412 | 5           | 4           | 38         | 3           | 2           | 1           | 3          |
| 413 | 1           | 1           | 2          | 4           | 1           | 2           | 2          |
| 414 | 1           | 1           | 4          | 2           | 1           | 3           | 2          |
| 415 | 13          | 1           | 2          | 13          | 1           | 1           | 5          |
| 416 | 76          | 1           | 1          | 13          | 1           | 1           | 1          |
| 417 | 5           | 28          | 6          | 13          | 2           | 1           | 3          |
| 418 | 13          | 1           | 1          | 2           | 1           | 1           | 33         |
| 419 | 77          | 1           | 1          | 13          | 1           | 9           | 1          |
| 420 | 1           | 1           | 1          | 2           | 1           | 1           | 2          |
| 421 | 1           | 1           | 2          | 46          | 1           | 29          | 2          |
| 422 | 1           | 1           | 1          | 13          | 1           | 2           | 1          |
| 423 | 13          | 1           | 3          | 1           | 12          | 2           | 2          |
| 424 | 1           | 1           | 2          | 1           | 12          | 2           | 2          |
| 425 | 13          | 1           | 2          | 1           | 1           | 2           | 2          |
| 426 | 78          | 4           | 6          | 3           | 2           | 1           | 3          |
| 427 | 5           | 1           | 6          | 3           | 2           | 1           | 2          |
| 428 | 1           | 1           | 2          | 46          | 40          | 2           | 2          |
| 429 | 1           | 1           | 2          | 46          | 1           | 2           | 2          |
| 430 | 1           | 1           | 3          | 1           | 9           | 2           | 2          |
| 431 | 13          | 1           | 1          | 2           | 1           | 9           | 5          |
| 432 | 9           | 1           | 1          | 1           | 5           | 2           | 2          |
| 433 | 1           | 1           | 1          | 2           | 1           | 1           | 33         |
| 434 | 1           | 2           | 1          | 1           | 1           | 2           | 2          |
| 435 | 74          | 10          | 6          | 3           | 2           | 1           | 3          |
| 436 | 75          | 1           | 1          | 2           | 1           | 1           | 1          |

| ST  | <i>adhP</i> | <i>pheS</i> | <i>atr</i> | <i>glnA</i> | <i>sdhA</i> | <i>glcK</i> | <i>tkl</i> |
|-----|-------------|-------------|------------|-------------|-------------|-------------|------------|
| 437 | 2           | 29          | 1          | 12          | 1           | 1           | 1          |
| 438 | 2           | 30          | 1          | 6           | 1           | 1           | 1          |
| 439 | 5           | 4           | 6          | 3           | 38          | 1           | 3          |
| 440 | 2           | 1           | 1          | 2           | 1           | 1           | 32         |
| 441 | 5           | 31          | 6          | 3           | 2           | 1           | 3          |
| 442 | 5           | 4           | 6          | 44          | 2           | 1           | 3          |
| 443 | 5           | 4           | 6          | 3           | 2           | 38          | 3          |
| 444 | 5           | 4           | 52         | 3           | 2           | 1           | 3          |
| 445 | 5           | 4           | 53         | 3           | 2           | 1           | 3          |
| 446 | 5           | 4           | 6          | 45          | 2           | 1           | 3          |
| 447 | 1           | 1           | 3          | 2           | 39          | 2           | 2          |
| 448 | 1           | 1           | 2          | 1           | 1           | 39          | 2          |
| 449 | 2           | 1           | 3          | 2           | 18          | 2           | 1          |
| 450 | 79          | 1           | 1          | 2           | 1           | 1           | 1          |
| 451 | 2           | 32          | 1          | 2           | 1           | 1           | 1          |
| 452 | 5           | 25          | 4          | 3           | 2           | 3           | 3          |
| 453 | 1           | 1           | 54         | 1           | 1           | 2           | 2          |
| 454 | 4           | 1           | 1          | 1           | 3           | 3           | 2          |
| 455 | 5           | 1           | 1          | 2           | 1           | 1           | 1          |
| 456 | 1           | 1           | 1          | 2           | 2           | 2           | 2          |
| 457 | 2           | 1           | 6          | 3           | 2           | 1           | 3          |
| 458 | 1           | 1           | 2          | 1           | 1           | 2           | 3          |
| 459 | 1           | 1           | 3          | 1           | 41          | 12          | 2          |
| 460 | 1           | 33          | 2          | 1           | 1           | 2           | 2          |
| 461 | 16          | 1           | 6          | 2           | 9           | 9           | 34         |
| 462 | 86          | 1           | 2          | 1           | 1           | 2           | 2          |
| 463 | 1           | 1           | 2          | 3           | 1           | 2           | 2          |
| 464 | 5           | 4           | 4          | 3           | 2           | 3           | 1          |
| 465 | 2           | 1           | 1          | 24          | 1           | 1           | 2          |
| 466 | 2           | 1           | 16         | 2           | 1           | 1           | 1          |
| 467 | 2           | 1           | 1          | 2           | 1           | 32          | 1          |
| 468 | 5           | 25          | 4          | 3           | 2           | 3           | 1          |
| 469 | 2           | 1           | 1          | 48          | 1           | 1           | 1          |
| 470 | 2           | 1           | 1          | 2           | 42          | 1           | 35         |
| 471 | 1           | 1           | 55         | 2           | 2           | 2           | 2          |
| 472 | 1           | 1           | 3          | 5           | 43          | 2           | 2          |
| 473 | 1           | 1           | 3          | 49          | 1           | 12          | 2          |
| 474 | 9           | 1           | 4          | 1           | 44          | 3           | 2          |
| 475 | 1           | 1           | 3          | 2           | 45          | 2           | 2          |
| 476 | 2           | 1           | 1          | 2           | 1           | 1           | 36         |
| 477 | 5           | 4           | 6          | 50          | 2           | 1           | 3          |
| 478 | 1           | 1           | 2          | 5           | 1           | 2           | 2          |
| 479 | 1           | 1           | 3          | 5           | 46          | 2           | 2          |
| 480 | 1           | 1           | 4          | 1           | 1           | 1           | 5          |
| 481 | 5           | 4           | 6          | 51          | 2           | 1           | 3          |
| 482 | 2           | 1           | 1          | 2           | 47          | 1           | 1          |
| 483 | 13          | 1           | 56         | 13          | 1           | 9           | 1          |
| 484 | 2           | 1           | 57         | 2           | 1           | 1           | 1          |
| 485 | 16          | 1           | 4          | 2           | 9           | 3           | 2          |
| 486 | 16          | 1           | 6          | 2           | 9           | 1           | 2          |
| 487 | 1           | 1           | 2          | 1           | 1           | 2           | 1          |
| 488 | 25          | 1           | 1          | 13          | 1           | 1           | 1          |
| 489 | 13          | 1           | 2          | 13          | 1           | 41          | 5          |
| 490 | 13          | 1           | 1          | 13          | 1           | 1           | 37         |
| 491 | 9           | 5           | 7          | 1           | 3           | 3           | 38         |
| 492 | 5           | 4           | 6          | 52          | 2           | 1           | 3          |
| 493 | 2           | 1           | 1          | 2           | 1           | 1           | 39         |
| 494 | 2           | 1           | 1          | 2           | 48          | 1           | 1          |
| 495 | 5           | 4           | 6          | 2           | 2           | 1           | 40         |
| 496 | 2           | 34          | 1          | 2           | 1           | 1           | 1          |
| 497 | 87          | 1           | 3          | 1           | 1           | 2           | 2          |
| 498 | 5           | 35          | 4          | 3           | 2           | 3           | 3          |
| 499 | 1           | 1           | 58         | 2           | 1           | 2           | 2          |

| ST  | <i>adhP</i> | <i>pheS</i> | <i>atr</i> | <i>glnA</i> | <i>sdhA</i> | <i>glcK</i> | <i>tkl</i> |
|-----|-------------|-------------|------------|-------------|-------------|-------------|------------|
| 500 | 10          | 1           | 2          | 1           | 49          | 2           | 2          |
| 501 | 5           | 4           | 59         | 3           | 2           | 1           | 3          |
| 502 | 88          | 1           | 3          | 1           | 1           | 2           | 2          |
| 503 | 89          | 1           | 4          | 1           | 3           | 3           | 2          |
| 504 | 80          | 1           | 3          | 2           | 2           | 2           | 2          |
| 505 | 81          | 4           | 1          | 3           | 1           | 1           | 3          |
| 506 | 82          | 4           | 6          | 3           | 2           | 1           | 3          |
| 507 | 83          | 1           | 2          | 1           | 1           | 2           | 2          |
| 508 | 84          | 1           | 4          | 47          | 3           | 3           | 2          |
| 509 | 10          | 1           | 4          | 1           | 3           | 40          | 2          |
| 510 | 85          | 1           | 3          | 2           | 2           | 2           | 2          |
| 511 | 2           | 1           | 60         | 2           | 1           | 1           | 2          |
| 512 | 2           | 1           | 1          | 53          | 1           | 1           | 1          |
| 513 | 10          | 1           | 4          | 54          | 3           | 3           | 2          |
| 514 | 1           | 1           | 2          | 55          | 1           | 2           | 2          |
| 515 | 2           | 1           | 1          | 56          | 1           | 1           | 1          |
| 516 | 90          | 1           | 4          | 1           | 1           | 3           | 41         |
| 517 | 91          | 1           | 1          | 2           | 1           | 1           | 1          |
| 518 | 1           | 1           | 2          | 57          | 1           | 2           | 2          |
| 519 | 9           | 36          | 4          | 1           | 5           | 3           | 4          |
| 520 | 1           | 1           | 3          | 58          | 2           | 2           | 2          |
| 521 | 1           | 1           | 3          | 2           | 2           | 42          | 2          |
| 522 | 2           | 1           | 1          | 2           | 1           | 1           | 42         |
| 523 | 8           | 1           | 4          | 1           | 3           | 3           | 43         |
| 524 | 1           | 1           | 2          | 1           | 1           | 2           | 44         |
| 525 | 96          | 3           | 1          | 3           | 1           | 1           | 1          |
| 526 | 97          | 8           | 4          | 1           | 5           | 3           | 4          |
| 527 | 98          | 1           | 4          | 1           | 3           | 3           | 2          |
| 528 | 5           | 4           | 6          | 3           | 2           | 3           | 3          |
| 529 | 1           | 1           | 4          | 4           | 2           | 3           | 2          |
| 530 | 99          | 1           | 2          | 1           | 1           | 2           | 2          |
| 531 | 100         | 1           | 2          | 1           | 1           | 2           | 2          |
| 532 | 1           | 1           | 3          | 5           | 50          | 2           | 2          |
| 533 | 94          | 1           | 2          | 1           | 1           | 43          | 2          |
| 534 | 93          | 4           | 4          | 3           | 2           | 3           | 3          |
| 535 | 1           | 1           | 2          | 1           | 1           | 2           | 45         |
| 536 | 4           | 1           | 4          | 59          | 3           | 3           | 2          |
| 537 | 1           | 1           | 61         | 5           | 2           | 2           | 2          |
| 538 | 101         | 1           | 4          | 1           | 3           | 3           | 2          |
| 539 | 5           | 4           | 7          | 3           | 2           | 3           | 3          |
| 540 | 2           | 1           | 2          | 1           | 1           | 1           | 1          |
| 541 | 46          | 9           | 3          | 5           | 2           | 2           | 2          |
| 542 | 2           | 37          | 1          | 2           | 1           | 1           | 1          |
| 543 | 102         | 1           | 1          | 2           | 1           | 1           | 1          |
| 544 | 103         | 1           | 3          | 2           | 2           | 2           | 2          |
| 545 | 5           | 4           | 62         | 3           | 2           | 1           | 3          |
| 546 | 10          | 38          | 2          | 1           | 3           | 2           | 2          |
| 547 | 1           | 1           | 3          | 2           | 2           | 45          | 2          |
| 548 | 104         | 1           | 4          | 1           | 3           | 3           | 2          |
| 549 | 9           | 1           | 2          | 1           | 3           | 2           | 46         |
| 550 | 2           | 1           | 1          | 40          | 1           | 1           | 1          |
| 551 | 105         | 1           | 3          | 1           | 1           | 2           | 2          |
| 552 | 52          | 17          | 31         | 4           | 26          | 26          | 19         |
| 553 | 52          | 17          | 31         | 4           | 2           | 26          | 19         |
| 554 | 13          | 39          | 1          | 13          | 1           | 1           | 1          |
| 555 | 1           | 1           | 3          | 2           | 18          | 2           | 47         |
| 556 | 5           | 4           | 6          | 3           | 2           | 44          | 3          |
| 557 | 2           | 1           | 1          | 60          | 1           | 1           | 1          |
| 558 | 10          | 1           | 2          | 1           | 3           | 2           | 5          |
| 559 | 1           | 1           | 16         | 2           | 2           | 2           | 5          |
| 560 | 10          | 1           | 4          | 1           | 3           | 46          | 2          |
| 561 | 1           | 1           | 3          | 5           | 2           | 45          | 2          |
| 562 | 9           | 1           | 4          | 1           | 3           | 1           | 2          |



| ST  | <i>adhP</i> | <i>pheS</i> | <i>atr</i> | <i>glnA</i> | <i>sdhA</i> | <i>glcK</i> | <i>tkt</i> |
|-----|-------------|-------------|------------|-------------|-------------|-------------|------------|
| 563 | 1           | 10          | 3          | 1           | 1           | 12          | 2          |
| 564 | 2           | 1           | 1          | 2           | 1           | 47          | 1          |
| 565 | 95          | 1           | 4          | 1           | 1           | 2           | 2          |
| 566 | 1           | 1           | 3          | 2           | 2           | 2           | 48         |
| 567 | 106         | 1           | 3          | 1           | 1           | 2           | 2          |
| 568 | 16          | 1           | 6          | 2           | 51          | 9           | 2          |
| 569 | 9           | 1           | 1          | 1           | 3           | 1           | 2          |
| 570 | 16          | 1           | 1          | 2           | 1           | 1           | 5          |
| 571 | 9           | 1           | 4          | 1           | 3           | 48          | 2          |
| 572 | 1           | 1           | 3          | 2           | 2           | 49          | 2          |
| 573 | 9           | 1           | 4          | 1           | 3           | 9           | 2          |
| 574 | 108         | 1           | 1          | 2           | 1           | 1           | 1          |
| 575 | 1           | 1           | 43         | 61          | 2           | 2           | 2          |
| 576 | 2           | 1           | 6          | 10          | 1           | 1           | 1          |
| 577 | 2           | 4           | 1          | 10          | 1           | 1           | 1          |
| 578 | 2           | 1           | 6          | 2           | 1           | 1           | 1          |
| 579 | 9           | 1           | 4          | 1           | 2           | 3           | 2          |
| 580 | 9           | 1           | 3          | 5           | 39          | 2           | 2          |
| 581 | 5           | 4           | 6          | 3           | 9           | 1           | 1          |
| 582 | 5           | 1           | 6          | 2           | 1           | 1           | 1          |
| 583 | 4           | 1           | 4          | 1           | 1           | 3           | 1          |
| 584 | 2           | 1           | 1          | 62          | 1           | 1           | 1          |
| 585 | 10          | 1           | 12         | 1           | 3           | 2           | 5          |
| 586 | 13          | 3           | 1          | 63          | 1           | 1           | 1          |
| 587 | 65          | 1           | 3          | 2           | 2           | 2           | 2          |
| 588 | 1           | 1           | 3          | 1           | 52          | 2           | 2          |
| 589 | 1           | 1           | 2          | 64          | 1           | 2           | 2          |
| 590 | 10          | 1           | 4          | 1           | 53          | 3           | 2          |
| 591 | 13          | 1           | 6          | 13          | 1           | 1           | 1          |
| 592 | 13          | 3           | 65         | 3           | 1           | 1           | 1          |
| 593 | 1           | 1           | 64         | 2           | 1           | 2           | 2          |
| 594 | 1           | 1           | 63         | 2           | 2           | 2           | 2          |
| 595 | 1           | 1           | 66         | 2           | 2           | 2           | 2          |
| 596 | 1           | 1           | 1          | 2           | 2           | 1           | 2          |
| 597 | 5           | 9           | 6          | 3           | 2           | 1           | 3          |
| 598 | 4           | 3           | 4          | 1           | 3           | 3           | 2          |
| 599 | 5           | 4           | 6          | 3           | 2           | 1           | 49         |
| 600 | 109         | 1           | 2          | 1           | 1           | 2           | 2          |
| 601 | 92          | 1           | 3          | 2           | 2           | 2           | 2          |
| 602 | 92          | 1           | 2          | 1           | 1           | 2           | 2          |
| 603 | 1           | 1           | 3          | 1           | 1           | 5           | 2          |
| 604 | 110         | 1           | 2          | 2           | 3           | 2           | 2          |
| 605 | 1           | 1           | 3          | 1           | 1           | 50          | 2          |
| 606 | 1           | 1           | 2          | 1           | 1           | 51          | 2          |
| 607 | 28          | 25          | 1          | 2           | 1           | 1           | 1          |
| 608 | 58          | 42          | 3          | 2           | 18          | 2           | 2          |
| 609 | 56          | 40          | 4          | 66          | 1           | 53          | 4          |
| 610 | 13          | 40          | 6          | 65          | 3           | 52          | 50         |
| 611 | 13          | 40          | 68         | 65          | 54          | 52          | 51         |
| 612 | 111         | 40          | 6          | 65          | 3           | 52          | 51         |
| 613 | 111         | 40          | 67         | 65          | 3           | 52          | 51         |
| 614 | 56          | 41          | 4          | 66          | 1           | 53          | 4          |
| 615 | 13          | 40          | 6          | 65          | 3           | 52          | 51         |
| 616 | 13          | 40          | 68         | 65          | 55          | 52          | 4          |
| 617 | 13          | 40          | 68         | 65          | 3           | 52          | 51         |
| 618 | 111         | 40          | 69         | 65          | 3           | 52          | 51         |
| 619 | 62          | 1           | 2          | 1           | 1           | 2           | 2          |
| 620 | 1           | 43          | 3          | 2           | 2           | 2           | 2          |
| 621 | 13          | 1           | 6          | 13          | 1           | 2           | 1          |
| 622 | 13          | 1           | 6          | 13          | 1           | 1           | 52         |
| 623 | 16          | 5           | 4          | 2           | 9           | 3           | 2          |
| 624 | 5           | 4           | 6          | 2           | 2           | 1           | 3          |
| 625 | 10          | 1           | 2          | 67          | 3           | 2           | 2          |

| ST  | <i>adhP</i> | <i>pheS</i> | <i>atr</i> | <i>glnA</i> | <i>sdhA</i> | <i>glcK</i> | <i>tkt</i> |
|-----|-------------|-------------|------------|-------------|-------------|-------------|------------|
| 626 | 5           | 10          | 70         | 3           | 2           | 1           | 3          |
| 627 | 5           | 4           | 6          | 3           | 2           | 1           | 53         |
| 628 | 1           | 1           | 3          | 1           | 1           | 54          | 2          |
| 629 | 9           | 1           | 4          | 1           | 56          | 3           | 2          |
| 630 | 5           | 4           | 6          | 68          | 2           | 1           | 3          |
| 631 | 2           | 44          | 1          | 2           | 1           | 1           | 1          |
| 632 | 13          | 45          | 1          | 13          | 1           | 1           | 1          |
| 633 | 113         | 1           | 6          | 2           | 9           | 9           | 2          |
| 634 | 112         | 1           | 2          | 1           | 1           | 2           | 2          |
| 635 | 1           | 1           | 71         | 1           | 1           | 2           | 2          |
| 636 | 1           | 1           | 2          | 1           | 1           | 55          | 2          |
| 637 | 9           | 1           | 4          | 3           | 3           | 3           | 2          |
| 638 | 9           | 1           | 3          | 2           | 2           | 2           | 9          |
| 639 | 5           | 4           | 6          | 3           | 57          | 1           | 3          |
| 640 | 5           | 4           | 6          | 3           | 58          | 1           | 3          |
| 641 | 5           | 4           | 72         | 3           | 2           | 1           | 3          |
| 642 | 5           | 4           | 6          | 3           | 2           | 1           | 54         |
| 643 | 2           | 1           | 73         | 2           | 1           | 1           | 1          |
| 644 | 1           | 46          | 6          | 1           | 1           | 2           | 2          |
| 645 | 94          | 1           | 3          | 1           | 1           | 2           | 2          |
| 646 | 1           | 1           | 3          | 2           | 2           | 2           | 55         |
| 647 | 1           | 1           | 3          | 69          | 2           | 2           | 2          |
| 648 | 114         | 1           | 2          | 1           | 1           | 2           | 2          |
| 649 | 115         | 4           | 6          | 3           | 2           | 1           | 3          |
| 650 | 1           | 1           | 3          | 4           | 2           | 1           | 2          |
| 651 | 16          | 1           | 6          | 70          | 9           | 9           | 2          |
| 652 | 116         | 1           | 4          | 1           | 3           | 3           | 2          |
| 653 | 1           | 47          | 3          | 5           | 2           | 2           | 2          |
| 654 | 117         | 1           | 4          | 1           | 3           | 3           | 2          |
| 655 | 2           | 1           | 74         | 2           | 1           | 56          | 1          |
| 656 | 13          | 48          | 1          | 3           | 1           | 1           | 1          |
| 657 | 118         | 1           | 2          | 1           | 1           | 2           | 2          |
| 658 | 10          | 1           | 4          | 1           | 3           | 3           | 5          |
| 659 | 119         | 1           | 4          | 1           | 3           | 3           | 2          |
| 660 | 4           | 1           | 75         | 1           | 3           | 3           | 2          |
| 661 | 5           | 4           | 6          | 3           | 59          | 1           | 3          |
| 662 | 5           | 4           | 6          | 71          | 2           | 1           | 3          |
| 663 | 5           | 49          | 6          | 3           | 2           | 1           | 3          |
| 664 | 5           | 50          | 4          | 3           | 2           | 3           | 3          |
| 665 | 5           | 4           | 6          | 3           | 61          | 1           | 3          |
| 666 | 5           | 4           | 6          | 3           | 60          | 1           | 3          |
| 667 | 1           | 1           | 76         | 1           | 1           | 2           | 2          |
| 668 | 9           | 1           | 77         | 1           | 3           | 3           | 2          |
| 669 | 1           | 1           | 1          | 3           | 1           | 1           | 1          |
| 670 | 2           | 1           | 4          | 2           | 1           | 1           | 1          |
| 671 | 1           | 1           | 1          | 1           | 41          | 12          | 2          |
| 672 | 2           | 1           | 3          | 1           | 1           | 1           | 3          |
| 673 | 1           | 1           | 3          | 2           | 18          | 2           | 1          |
| 674 | 4           | 1           | 6          | 1           | 3           | 2           | 2          |
| 675 | 1           | 1           | 1          | 2           | 2           | 2           | 3          |
| 676 | 1           | 51          | 2          | 1           | 1           | 2           | 2          |
| 677 | 122         | 1           | 3          | 2           | 2           | 2           | 2          |
| 678 | 1           | 37          | 2          | 1           | 1           | 2           | 2          |
| 679 | 1           | 9           | 2          | 1           | 1           | 2           | 2          |
| 680 | 2           | 9           | 1          | 2           | 1           | 1           | 1          |
| 681 | 35          | 2           | 2          | 1           | 1           | 2           | 2          |
| 682 | 1           | 25          | 2          | 1           | 1           | 2           | 2          |
| 683 | 13          | 1           | 3          | 4           | 2           | 2           | 2          |
| 684 | 107         | 10          | 6          | 3           | 2           | 1           | 3          |
| 685 | 118         | 1           | 3          | 2           | 2           | 2           | 2          |
| 686 | 5           | 4           | 6          | 3           | 2           | 54          | 54         |
| 687 | 1           | 1           | 3          | 2           | 35          | 2           | 2          |
| 688 | 1           | 1           | 3          | 48          | 29          | 2           | 43         |

| <b>ST</b>  | <b><i>adhP</i></b> | <b><i>pheS</i></b> | <b><i>atr</i></b> | <b><i>glnA</i></b> | <b><i>sdhA</i></b> | <b><i>glcK</i></b> | <b><i>tkt</i></b> |
|------------|--------------------|--------------------|-------------------|--------------------|--------------------|--------------------|-------------------|
| <b>689</b> | 1                  | 1                  | 3                 | 1                  | 14                 | 2                  | 2                 |
| <b>690</b> | 9                  | 1                  | 7                 | 1                  | 3                  | 3                  | 2                 |
| <b>691</b> | 1                  | 33                 | 4                 | 2                  | 2                  | 2                  | 2                 |
| <b>692</b> | 10                 | 1                  | 4                 | 1                  | 3                  | 3                  | 28                |
| <b>693</b> | 46                 | 1                  | 2                 | 1                  | 1                  | 2                  | 2                 |
| <b>694</b> | 122                | 1                  | 2                 | 1                  | 1                  | 2                  | 2                 |
| <b>695</b> | 1                  | 33                 | 3                 | 1                  | 1                  | 12                 | 2                 |
| <b>696</b> | 4                  | 4                  | 4                 | 1                  | 3                  | 3                  | 2                 |
| <b>697</b> | 46                 | 1                  | 3                 | 1                  | 1                  | 2                  | 2                 |
| <b>698</b> | 1                  | 37                 | 2                 | 1                  | 22                 | 2                  | 2                 |
| <b>699</b> | 10                 | 1                  | 2                 | 1                  | 1                  | 3                  | 2                 |
| <b>700</b> | 1                  | 1                  | 2                 | 37                 | 1                  | 2                  | 2                 |
